# Supplementary material for: Construction of acid–base bifunctional covalent organic frameworks via Doebner reaction for catalysing cascade reaction
Source: Royal Society of Chemistry journal article supplement (doi:10.1039/d1cc06461d), 2022-01-01
Supplement: d1cc06461d1.pdf [file d1cc06461d1.pdf]

Supporting Information for

# **Construction of acid–base bifunctional covalent organic frameworks via Doebner reaction for catalysing cascade reaction**

Xue-Tian Li,<sup>†</sup> Jie Zou,<sup>†</sup> Qi Yu, Yan Liu, Jing-Ru Li, Meng-Jing Li, Hui-Chao Ma, Gong-Jun Chen,<sup>\*</sup> and Yu-Bin Dong<sup>\*</sup>

## **Table of Contents**

- I. Instruments and methods (page S2)**
- II. Synthesis and characterization of model compound 2-(2-methoxyphenyl)quinoline-4-carboxylic acid via Doebner reaction (page S2, Fig. S1- Fig. S3 )**
- III. Synthesis and characterization of COFs (page S4)**
  - 1. Synthesis and Characterization of TAPB-DMTP-PA-COF (Fig. S4- Fig. S15)**
  - 2. Synthesis and characterization of TAPB-TFPB-PA-COF (Fig. S16- Fig. S18)**
  - 3. Synthesis and characterization of TAPT-TFPB-PA-COF (Fig. S19- Fig. S21)**
  - 4. Synthesis and characterization of TAPB-TP-PA-COF (Fig. S22- Fig. S24)**
  - 5. Synthesis and characterization of TAPT-TP-PA-COF (Fig. S25- Fig. S27)**
- IV. Synthesis and characterization of benzylidenemalononitrile (page S24, Fig. S28-S30)**
- V. Leaching test (page S26, Fig. S31 )**
- VI. Catalyst regeneration (page S27, Fig. S32)**
- VII. Comparison of TAPB-DMTP-PA-COF with the reported catalysts (page S29)**
- VIII. Control experiments for clarifying the cascade deacetalization–Knoevenagel condensation reaction process (page 30, Fig. S33-S37)**
- IX. Continuous flow-through operation (page S33, Fig. S38-S39)**
- X. Reference (page S35)**

## I. Instruments and methods

The reagents and solvents employed were commercially available and used without further purification. The powder diffractometer (XRD) patterns were collected by a D8 ADVANCE X-ray with Cu K $\alpha$  radiation ( $\lambda = 1.5405 \text{ \AA}$ ). The total surface areas of the COFs were measured by the BET (Brunauer–Emmer–Teller) method using N<sub>2</sub> adsorption at 77 K, this was done by the Micromeritics ASAP 2000 sorption/desorption analyzer. Infrared (IR) samples were prepared as KBr pellets, and spectra were obtained in the 400–4000 cm<sup>-1</sup> range using a Perkin-Elmer 1600 FTIR spectrometer. <sup>13</sup>C NMR spectra were recorded on a MERCURY plus 400 spectrometer operating at resonance frequencies of 400 MHz. Thermogravimetric analyses (TGA) were carried out under flowing nitrogen at a heating rate of 10 °C·min<sup>-1</sup> on a TA Instrument Q5 analyzer. XPS spectra were obtained from PHI Versaprobe II. TEM (transmission electron microscopy) analysis was performed on a JEOL 2100 Electron Microscope at an operating voltage of 200 kV. Scanning electron microscopy (SEM) images were taken on a SUB010 scanning electron microscope with acceleration voltage of 20 kV.

## II. Synthesis and characterization of model compound 2-(2-methoxyphenyl)quinoline-4-carboxylic acid via Doebner reaction

**Synthesis of 2-(2-methoxyphenyl)-quinoline-4-carboxylic acid.** A mixture of 2-methoxybenzaldehyde (120.8  $\mu\text{L}$ , 1.0 mmol), benzenamine (91.3  $\mu\text{L}$ , 1.0 mmol), pyruvic acid (75.0  $\mu\text{L}$ , 1.5 mmol) and 2, 3-dichloro-5,6-dicyano-1,4-benzoquinone (DDQ) (50 mg, 1.0 mmol) in 5 mL ethanol was refluxed for 3 h (monitored by TLC). Then, the reaction mixture poured into ice water (10 mL) and the obtained crude product was purified by column chromatography. The product was characterized by MS, <sup>1</sup>H NMR, and FT-IR spectra.

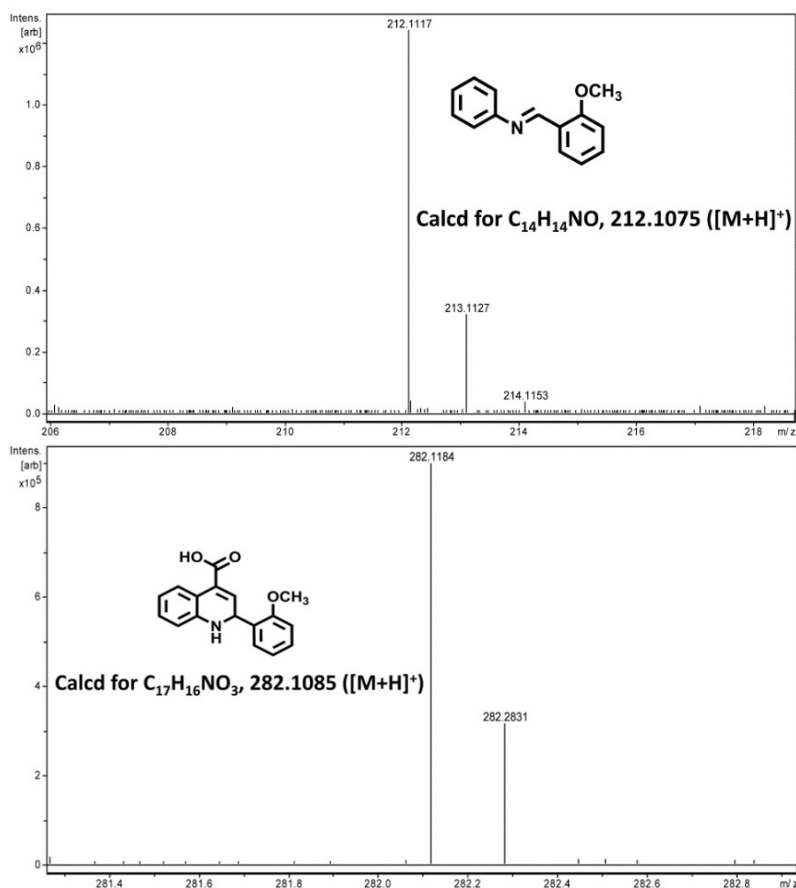

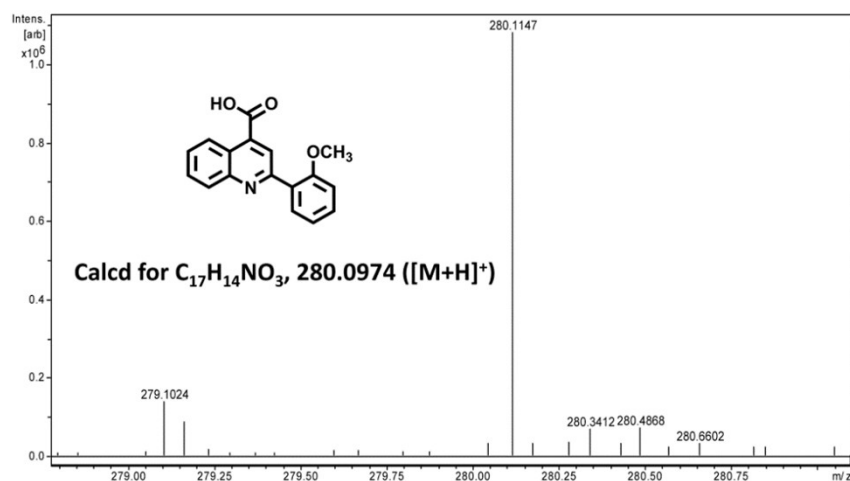

**Fig. S1** ESI-MS spectra of 2-(2-methoxy-phenyl)-quinoline-4-carboxylic acid, and its intermediates from the reaction of aniline, 2-methoxybenzaldehyde and pyruvic acid

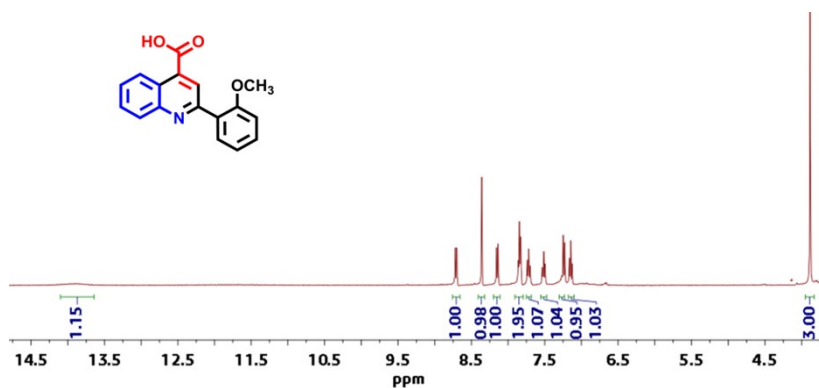

**Fig. S2**  $^1H$  NMR of 2-(2-methoxyphenyl)-1,2-dihydroquinoline-4-carboxylic acid.

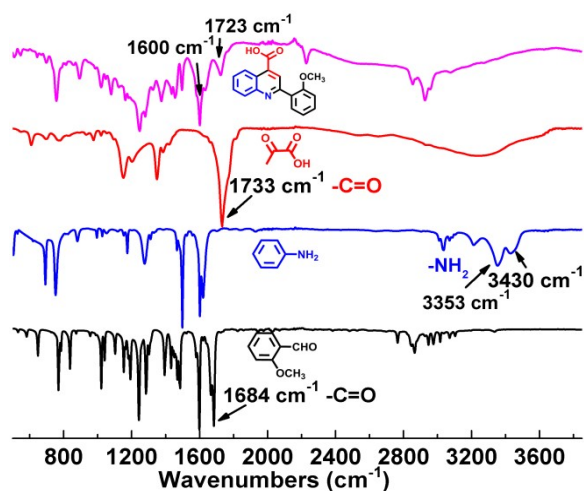

**Fig. S3** FT-IR spectra of 2-(2-methoxyphenyl)-1,2-dihydroquinoline-4-carboxylic acid and its starting materials.

### III. Synthesis and characterization of COFs

#### 1. Synthesis and Characterization of TAPB-DMTP-PA-COF.

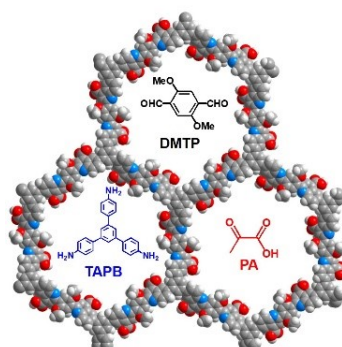

**TAPB-DMTP-PA-COF**

A mixture of 1,3,5-tri(4-aminophenyl)benzene (TAPB) (0.040 mmol, 14.0 mg), 2,5-dimethoxy terephthalaldehyde (DMTP) (0.060 mmol, 11.7 mg), pyruvic acid (PA) (0.12 mmol, 12  $\mu$ L), 2,3-dichloro-5,6-dicyano-1,4-benzoquinone (DDQ) (10.67 mg, 0.04 mmol) and in the *o*-dichlorobenzene (*o*-DCB)/*n*-BuOH (1.0/1.0 mL) mixture was sealed in a Pyrex tube (35 mL) and heated under  $N_2$  at 120  $^{\circ}C$  for 3 days. The generated solids were collected by centrifugation and completely washed with dichloromethane and ethanol and dried in vacuum to afford **TAPB-DMTP-PA-COF** in 85 % yield.

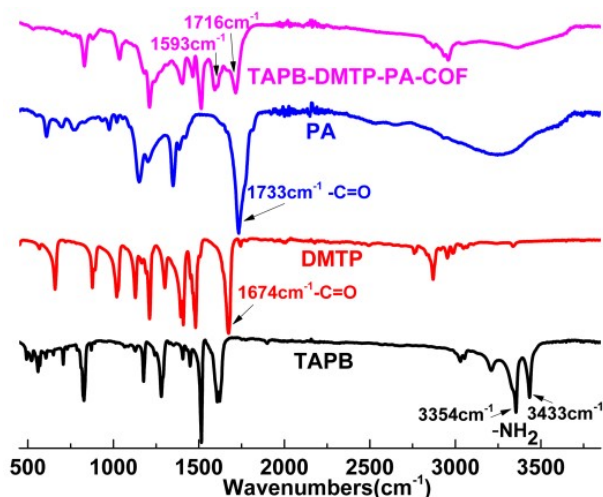

**Fig. S4** FT-IR spectra of **TAPB-DMTP-PA-COF** and its monomers. The disappearance of the peaks at 3354  $cm^{-1}$ , 3433  $cm^{-1}$  (N-H band for TAPB), 1674  $cm^{-1}$  (C=O band for DMTP) and 1733  $cm^{-1}$  (C=O band for PA) and the appearance of characteristic bands at 1593 $cm^{-1}$  and 1716 $cm^{-1}$  associated with pyridyl stretching band and C=O band of carboxylic acids demonstrated the successful formation of **TAPB-DMTP-PA-COF**.

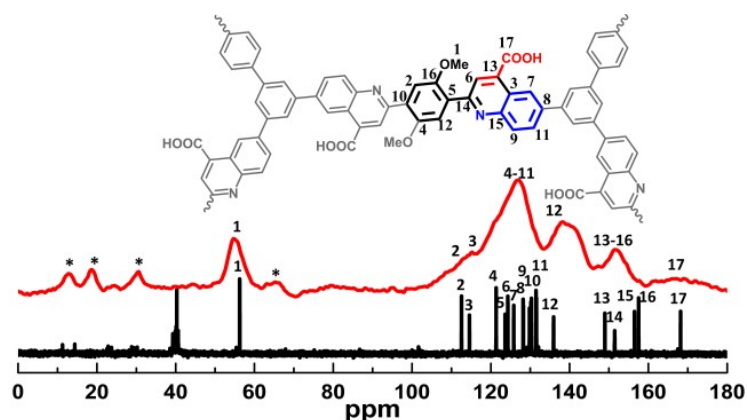

**Fig. S5**  $^{13}\text{C}$  NMR spectrum of **TAPB-DMTP-PA-COF** (red line) and  $^{13}\text{C}$  NMR spectrum of model compound (2-(2-methoxyphenyl)-1,2-dihydroquinoline-4-carboxylic acid) (black line). The existence of methoxy (56.5 ppm), aromatic (100-155 ppm) and carboxylic acid (167.5 ppm) carbons was well supported the formation of **TAPB-DMTP-PA-COF** (the asterisks denote the solvent *n*-butyl alcohol).

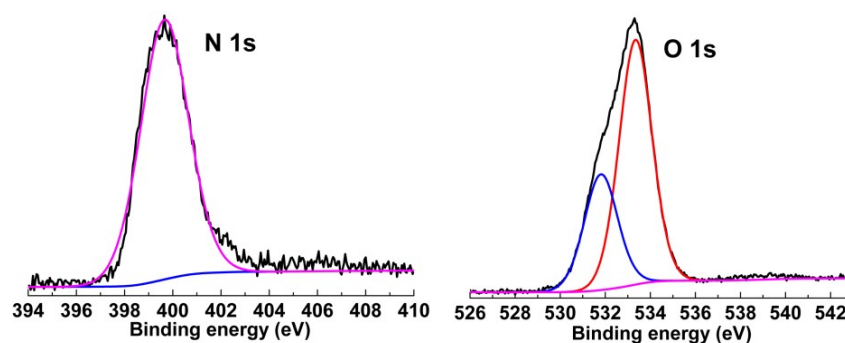

**Fig. S6** XPS spectra of **TAPB-DMTP-PA-COF**. The N 1s peak at 399.7 eV originated from quinoyl group, and O 1s peaks at 531.7 and 533.3 eV respectively associated with methoxyl and carboxyl moieties were observed.

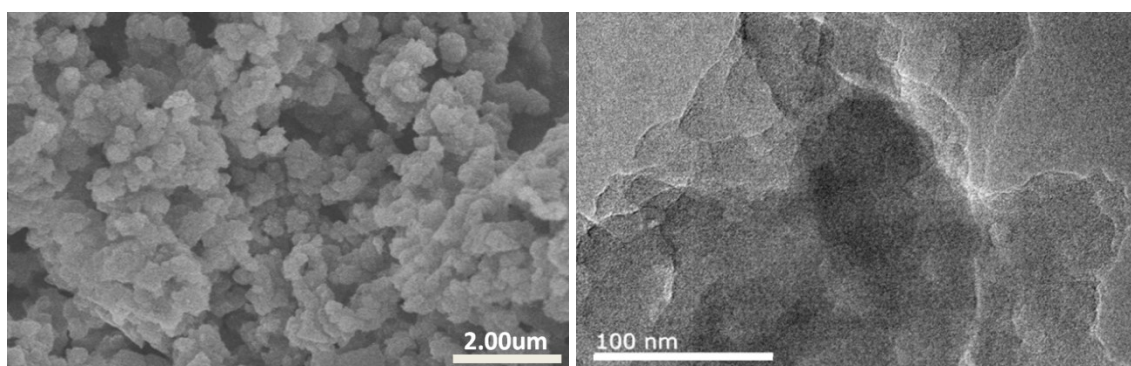

**Fig. S7** SEM (left) and TEM (right) images of **TAPB-DMTP-PA-COF**.

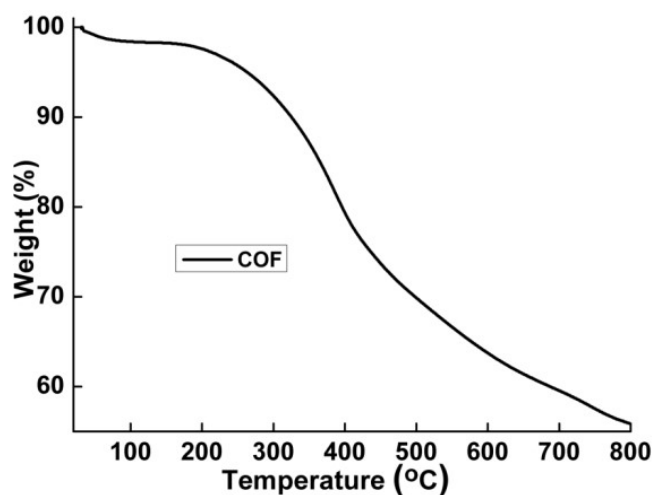

**Fig. S8** TGA trace of **TAPB-DMTP-PA-COF**.

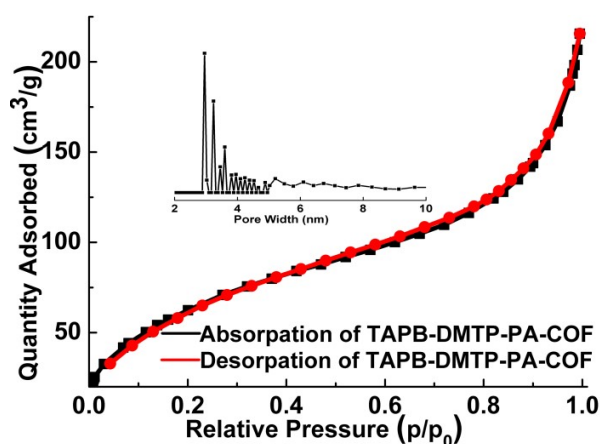

**Fig. S9** N<sub>2</sub> adsorption and desorption isotherms of **TAPB-DMTP-PA-COF**. Its pore size distribution is shown as inset.

Structural modeling of **TAPB-DMTP-PA-COF** was generated using the Materials Studio (ver. 2018) suite of programs. Molecular geometry optimization was performed with MS DMol3 module. The initial lattice was created by starting with the space group *P6*. The *a* and *b* lattice parameters (initially 37.2204 Å) were estimated according to the center to center distance between the vertices of COF. The constructed model was geometry optimized using the Forcite module (Universal force fields, Ewald summations). Then the calculated PXRD pattern was generated with the Reflex Plus module. Finally, Pawley refinement was applied for profile fitting, producing the refined PXRD profile with the lattice parameters of  $a = b = 37.2204 \text{ \AA}$  ( $\pm 0.002$ ) Å and  $c = 3.8725 (\pm 0.002) \text{ \AA}$ . *R*<sub>w</sub>*p* and *R*<sub>p</sub> values converged to 6.18 and 4.72 %, respectively. Reflex Module in Material Studio using data from  $2\theta = 2.0\text{-}30^\circ$ . Backgrounds were first refined applying a 2nd order Chebyshev Polynomial.

Atomistic coordinates for the AA-stacking mode of **TAPB-DMTP-PA-COF** (space group *P6*,  $a = b = 37.2204 \text{ \AA}$ ,  $c = 3.8725 \text{ \AA}$ ,  $\alpha = \beta = 90^\circ$  and  $\gamma = 120^\circ$ , *wR*<sub>p</sub> = 6.18 % and *R*<sub>p</sub> = 4.72 %).

**Table S1.** Simulated AA-stacking structure of **TAPB-DMTP-PA-COF**

| Atom | x/a     | y/b     | z/c     | Atom | x/a     | y/b     | z/c      |
|------|---------|---------|---------|------|---------|---------|----------|
| C1   | 0.35755 | 0.64709 | 0.65748 | C2   | 0.37659 | 0.69057 | 0.65743  |
| C3   | 0.38302 | 0.62634 | 0.66173 | C4   | 0.36883 | 0.58786 | 0.49597  |
| C5   | 0.39158 | 0.56690 | 0.51176 | C6   | 0.43084 | 0.58698 | 0.67498  |
| C7   | 0.44543 | 0.62548 | 0.83340 | C8   | 0.42152 | 0.64470 | 0.83228  |
| N9   | 0.45475 | 0.56897 | 0.68009 | C10  | 0.44291 | 0.53172 | 0.52967  |
| C11  | 0.47150 | 0.51462 | 0.54367 | C12  | 0.45681 | 0.47165 | 0.57003  |
| C13  | 0.48557 | 0.45755 | 0.55146 | O14  | 0.41403 | 0.44454 | 0.62614  |
| C15  | 0.40091 | 0.40389 | 0.75508 | H16  | 0.41005 | 0.70907 | 0.65860  |
| H17  | 0.34117 | 0.57573 | 0.34059 | C18  | 0.37765 | 0.52732 | 0.36029  |
| H19  | 0.47514 | 0.64030 | 0.96408 | H20  | 0.43305 | 0.67363 | 0.97104  |
| C21  | 0.40451 | 0.51098 | 0.35962 | H22  | 0.47472 | 0.42466 | 0.54543  |
| H23  | 0.41917 | 0.40550 | 0.98657 | H24  | 0.40384 | 0.38427 | 0.55443  |
| H25  | 0.36775 | 0.38913 | 0.82944 | H26  | 0.39530 | 0.48206 | 0.22737  |
| C27  | 0.66490 | 0.49904 | 0.21921 | O28  | 0.67110 | 0.52490 | -0.00171 |
| O29  | 0.69843 | 0.49669 | 0.35399 | H30  | 0.72569 | 0.51679 | 0.23913  |

**Table S2.** Simulated AB-stacking structure of **TAPB-DMTP-PA-COF**

| Atom | x/a      | y/b      | z/c      | Atom | x/a      | y/b     | z/c      |
|------|----------|----------|----------|------|----------|---------|----------|
| C1   | -0.30974 | 0.31241  | 0.49438  | C2   | -0.28930 | 0.35666 | 0.49594  |
| C3   | -0.28622 | 0.29186  | 0.48198  | C4   | -0.29180 | 0.26581 | 0.33913  |
| C5   | -0.26709 | 0.24655  | 0.31565  | C6   | -0.23807 | 0.25200 | 0.44771  |
| C7   | -0.23272 | 0.27722  | 0.59205  | C8   | -0.25623 | 0.29753 | 0.60776  |
| N9   | -0.21486 | 0.23289  | 0.43546  | C10  | -0.21668 | 0.20847 | 0.30127  |
| C11  | -0.19043 | 0.19057  | 0.30046  | C12  | -0.20412 | 0.14933 | 0.24110  |
| C13  | -0.17495 | 0.13524  | 0.22737  | O14  | -0.24551 | 0.12396 | 0.20134  |
| C15  | -0.26731 | 0.08161  | 0.14043  | H16  | -0.25719 | 0.37371 | 0.49469  |
| H17  | -0.31419 | 0.26128  | 0.25082  | C18  | -0.26963 | 0.22203 | 0.16940  |
| H19  | -0.21159 | 0.28110  | 0.68577  | H20  | -0.25148 | 0.31627 | 0.71226  |
| C21  | -0.24409 | 0.20337  | 0.16451  | H22  | -0.18568 | 0.10566 | 0.18232  |
| H23  | -0.26447 | 0.06082  | 0.23242  | H24  | -0.25490 | 0.07938 | 0.01616  |
| H25  | -0.30038 | 0.07182  | 0.12536  | H26  | -0.29559 | 0.21584 | 0.02613  |
| C27  | -0.29929 | 0.24736  | -0.04467 | O28  | -0.31550 | 0.18076 | -0.04533 |
| H29  | -0.24477 | 0.18656  | 0.05848  | C30  | -0.02468 | 0.02086 | 0.20892  |
| C31  | -0.04326 | -0.02341 | 0.20816  | C32  | -0.04911 | 0.04153 | 0.20833  |
| C33  | -0.03115 | 0.08499  | 0.24697  | C34  | -0.05254 | 0.10777 | 0.22853  |

|     |          |          |         |     |          |         |         |
|-----|----------|----------|---------|-----|----------|---------|---------|
| C35 | -0.09652 | 0.08396  | 0.20607 | C36 | -0.11640 | 0.04076 | 0.17417 |
| C37 | -0.09270 | 0.02054  | 0.16854 | N38 | -0.11978 | 0.10289 | 0.22077 |
| C39 | -0.10411 | 0.14469  | 0.24501 | C40 | -0.13217 | 0.16018 | 0.27458 |
| C41 | -0.12034 | 0.19926  | 0.35559 | C42 | -0.14886 | 0.21435 | 0.36182 |
| O43 | -0.08184 | 0.22147  | 0.43125 | C44 | -0.06289 | 0.26042 | 0.52268 |
| H45 | -0.07481 | -0.04037 | 0.20596 | H46 | -0.00145 | 0.10123 | 0.29272 |
| C47 | -0.03309 | 0.15247  | 0.23381 | H48 | -0.14809 | 0.02388 | 0.15458 |
| H49 | -0.10889 | -0.01028 | 0.13510 | C50 | -0.05990 | 0.16989 | 0.23518 |
| H51 | -0.13898 | 0.24347  | 0.41203 | H52 | -0.08153 | 0.25803 | 0.63555 |
| H53 | -0.05993 | 0.28560  | 0.43945 | H54 | -0.03171 | 0.26774 | 0.56445 |
| C55 | 0.01117  | 0.18028  | 0.23339 | C56 | 0.03854  | 0.17289 | 0.12955 |
| C57 | 0.08231  | 0.19937  | 0.13591 | C58 | 0.09979  | 0.23589 | 0.23592 |
| C59 | 0.07336  | 0.24514  | 0.33297 | C60 | 0.02985  | 0.21722 | 0.33545 |
| H61 | -0.04686 | 0.20163  | 0.22691 | H62 | 0.02692  | 0.14781 | 0.04812 |
| H63 | 0.10151  | 0.19226  | 0.06716 | H64 | 0.13152  | 0.25568 | 0.23765 |
| H65 | 0.08585  | 0.27218  | 0.40212 | H66 | 0.01197  | 0.22435 | 0.41364 |
| H67 | 0.44039  | 0.71616  | 0.50285 |     |          |         |         |

Atomistic coordinates for the AB-stacking mode of **TAPB-DMTP-PA-COF** (space group  $P63$ ,  $a = b = 36.8357 \text{ \AA}$ ,  $c = 7.7843 \text{ \AA}$ ,  $\alpha = \beta = 90^\circ$  and  $\gamma = 120^\circ$ ,  $wRp = 10.07 \%$  and  $Rp = 7.77 \%$ ).

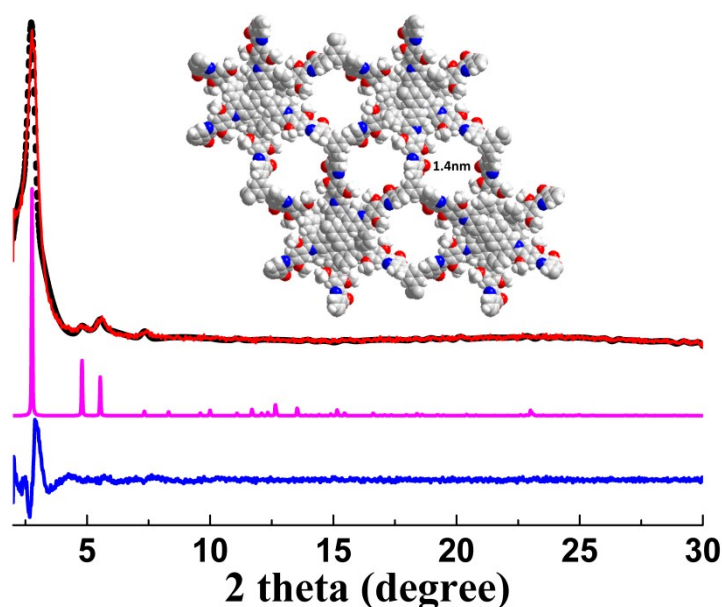

**Fig. 10** Powder X-ray diffraction patterns of **TAPB-DMTP-PA-COF**: comparison between the experimental (red line) and Pawley refined (black dots) profiles, the simulated pattern for eclipsed (AB) stacking mode (pink line) and the refinement difference (blue line). Inset is AB-stacking structure of **TAPB-DMTP-PA-COF**.



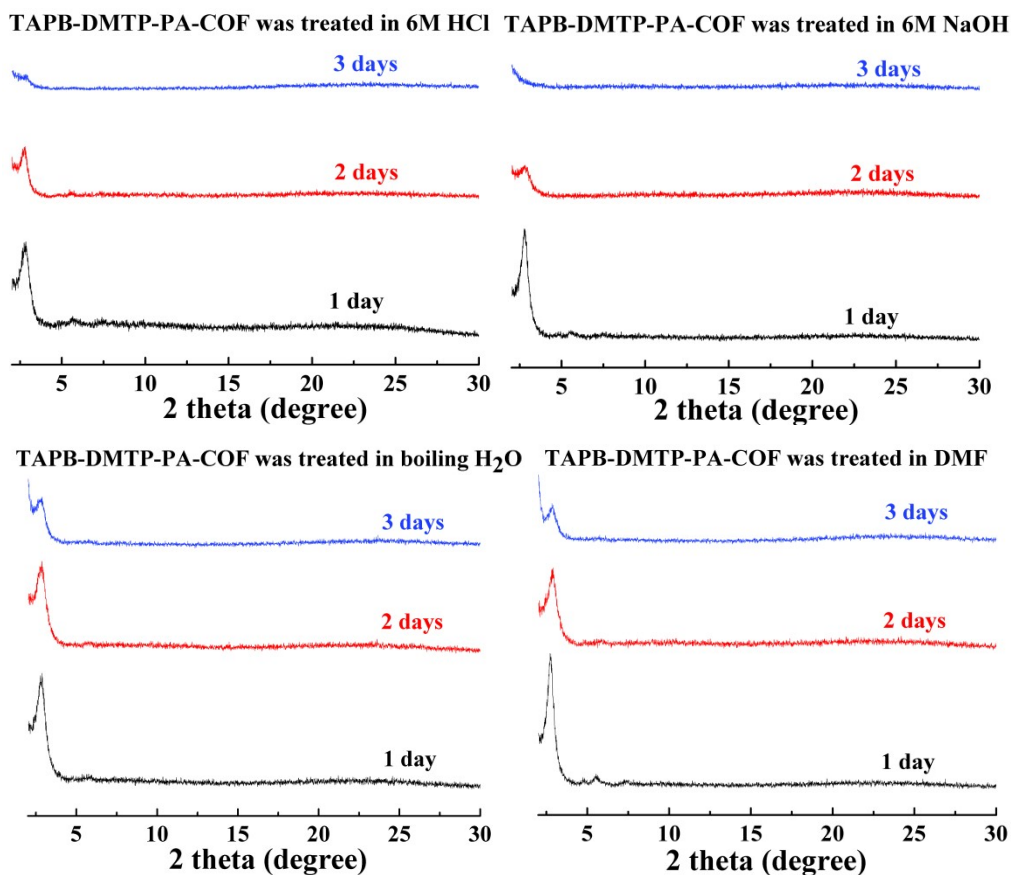

**Fig. S11** PXRD patterns of **TAPB-DMTP-PA-COF** treated in different solvents. **TAPB-DMTP-PA-COF** treated in boiling  $H_2O$  and 6M NaOH showed no obvious weight loss for 3 days, but there is ca. 5.0 % weight loss was observed after it was treated in DMF and 6M HCl for 3 days.

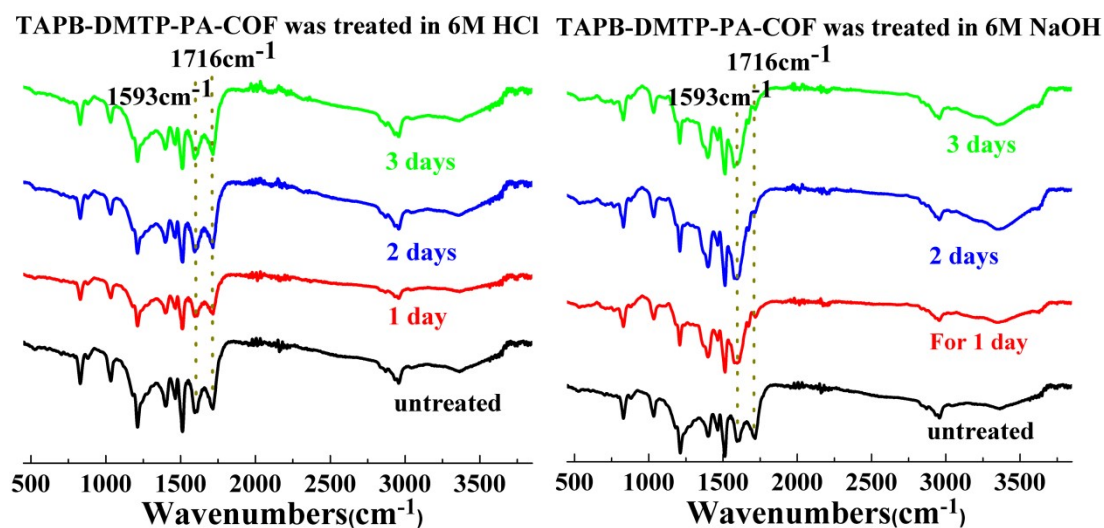

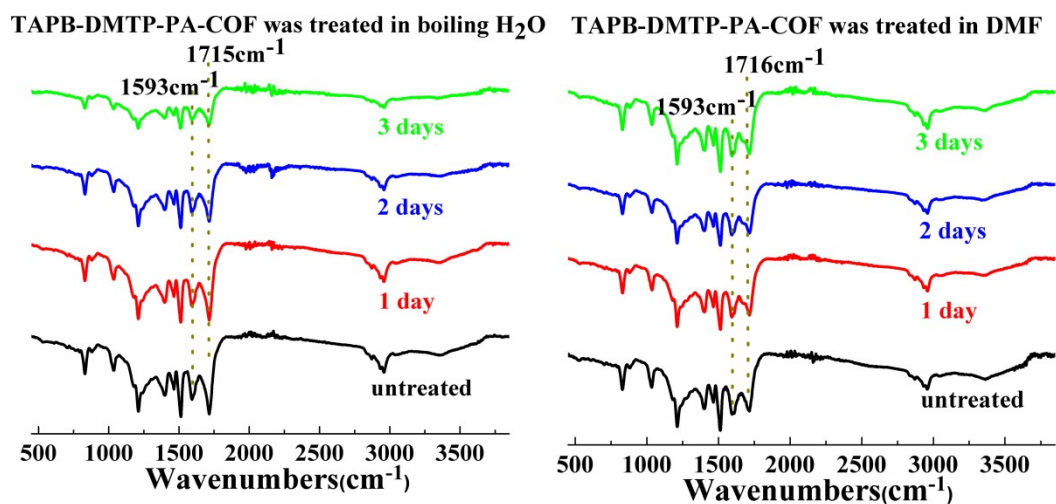

**Fig. S12** FT-IR spectra of **TAPB-DMTP-PA-COF** treated in different solvents.

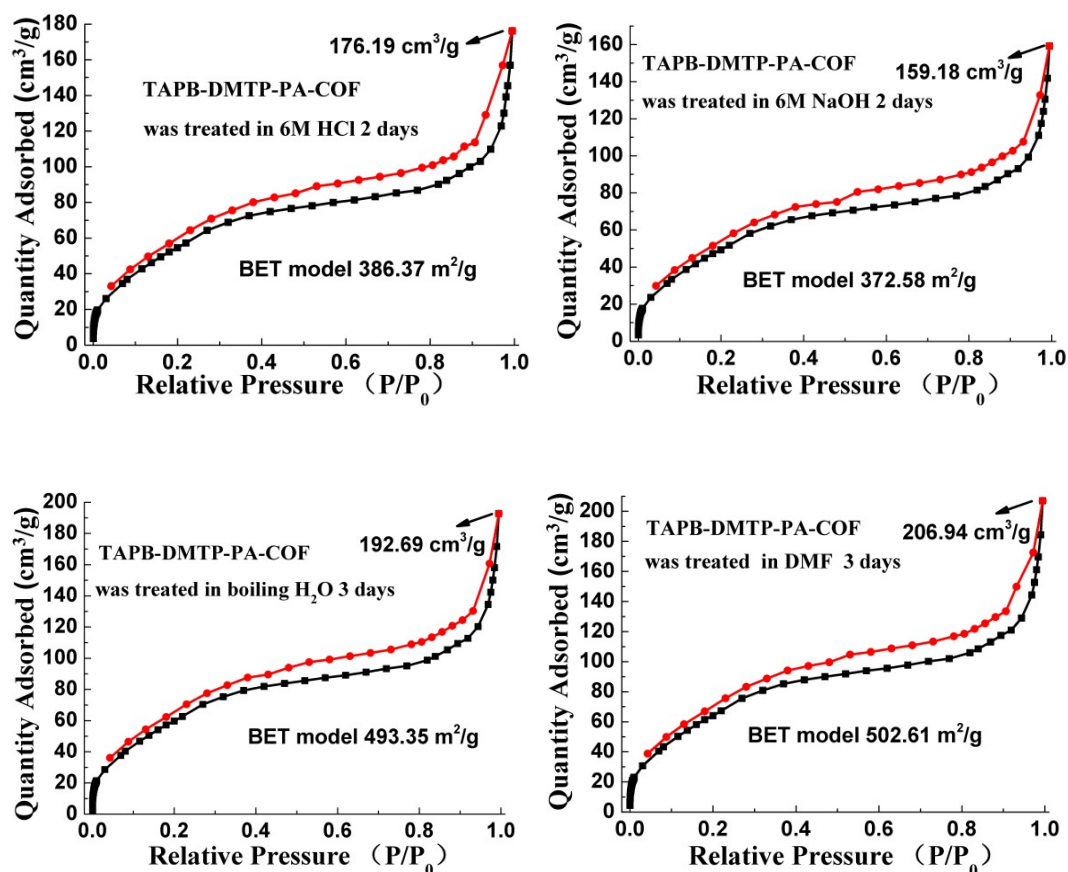

**Fig. S13** N<sub>2</sub> adsorption and desorption isotherms of **TAPB-DMTP-PA-COF** treated in different solvents (boiling H<sub>2</sub>O and DMF for 3 days, 6M HCl and 6M NaOH for 2 days). The slightly decreased adsorption capacity might result from the decreased crystallinity of **TAPB-DMTP-PA-COF** after treatment.

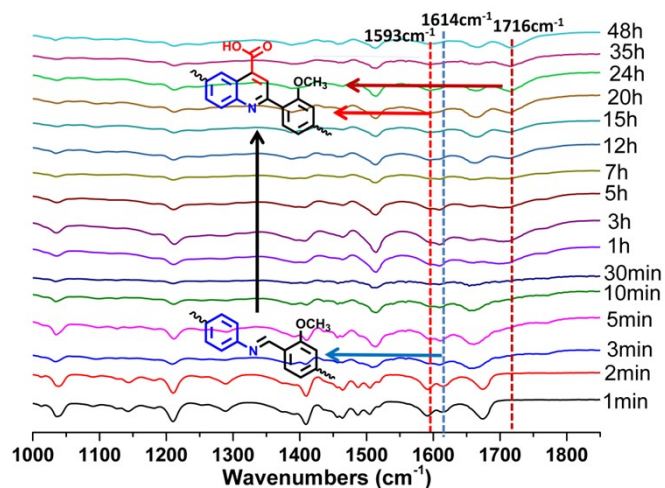

**Fig. S14** FT-IR spectra for monitoring the formation of **TAPB-DMTP-PA-COF**. A mixture of 1,3,5-tri(4-aminophenyl)benzene (TAPB) (0.040 mmol, 14.0 mg), 2,5-dimethoxy terephthalaldehyde (DMTP) (0.060 mmol, 11.7 mg), pyruvic acid (PA) (0.12 mmol, 12  $\mu$ L), 2,3-dichloro-5,6-dicyano-1,4-benzoquinone (DDQ) (10.67 mg, 0.04 mmol) in *o*-dichlorobenzene (*o*-DCB)/*n*-BuOH (1.0/1.0 mL) was sealed in a Pyrex tube (35 mL) and heated in  $N_2$  at 120  $^{\circ}C$ . The generated solids were collected by centrifugation at different time, and they were completely washed with dichloromethane and ethanol and dried in vacuum for IR measurement.

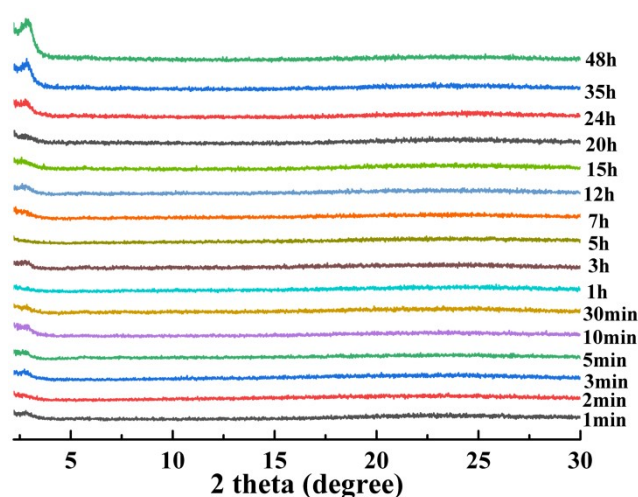

**Fig. S15** PXRD spectra for monitoring the **TAPB-DMTP-PA-COF** formation.

## 2. Synthesis and characterization of TAPB-TFPB-PA-COF

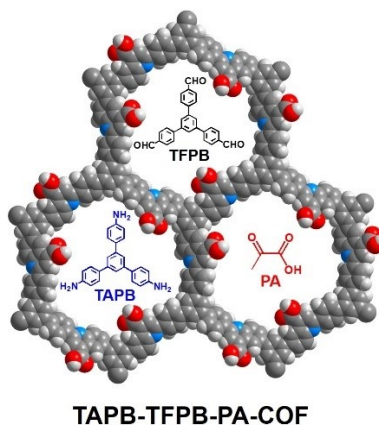

**TAPB-TFPB-PA-COF** was obtained by combination of TAPB, TFPB and PA via Doebner reaction. The synthesis procedure is the same as that of **TAPB-DMTP-PA-COF**. Yield, 88 %.

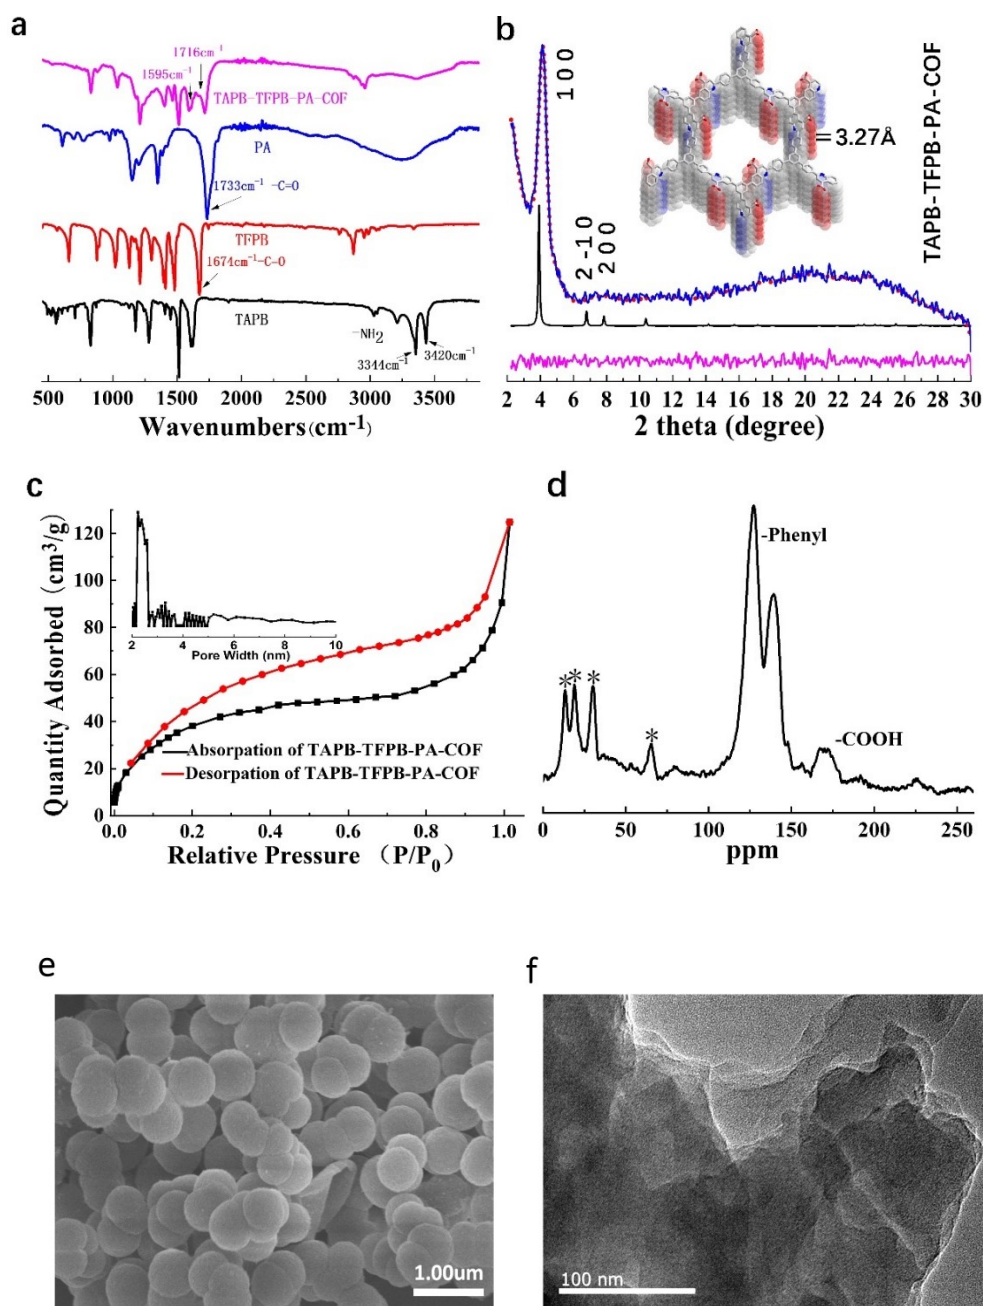

**Fig. S16** a) FT-IR spectra of **TAPB-TFPB-PA-COF** and its monomers. The characteristic peaks of amine ( $3344$  and  $3420$   $\text{cm}^{-1}$ ), aldehyde ( $1674$   $\text{cm}^{-1}$ ) and  $\text{C}=\text{O}$  of pyruvic acid ( $1733$   $\text{cm}^{-1}$ ) disappeared after reaction, meanwhile the characteristic peaks at  $1595$  and  $1716$   $\text{cm}^{-1}$  appeared, demonstrating the formation of **TAPB-TFPB-PA-COF**. b) PXRD of **TAPB-TFPB-PA-COF**: comparison between the experimental (blue line) and Pawley refined (red dots) profiles, the simulated pattern for eclipsed (AA) stacking mode (black line) and the refinement difference (purple line). Inset is the simulated structure of **TAPB-TFPB-PA-COF**. c)  $\text{N}_2$  adsorption at  $77$  K revealed absorption amount of **TAPB-TFPB-PA-COF** is  $109.81$   $\text{cm}^3/\text{g}$ , and its surface area calculated based on the BET model was determined as  $165.37$   $\text{m}^2/\text{g}$ . Pore size distribution curve, calculated from Barrett-Joyner-Halenda analysis, showed that the pore width of **TAPB-TFPB-PA-COF** is centered at  $2.2$  nm, which is in good agreement with its simulated structure. d)  $^{13}\text{C}$  (CP/MAS) NMR



spectrum. The peaks at 109-160 ppm and 170 ppm are respectively associated with aromatic and carboxylic acid carbons, and the asterisks denote the solvent *n*-butyl alcohol. e) TEM image of **TAPB-TFPB-PA-COF**. f) SEM image of **TAPB-TFPB-PA-COF**.

The simulation method is the same as that of **TAPB-DMTP-PA-COF**. Atomistic coordinates for the AA-stacking mode of **TAPB-TFPB-PA-COF** (space group *P*3,  $a = b = 26.0294 \text{ \AA}$ ,  $c = 3.8304 \text{ \AA}$ ,  $\alpha = \beta = 90^\circ$  and  $\gamma = 120^\circ$ ,  $wRp = 3.29 \%$  and  $Rp = 2.45 \%$ ).

**Table S3.** Simulated structure of **TAPB-TFPB-PA-COF**

| Atom | x/a     | y/b     | z/c     | Atom | x/a     | y/b     | z/c     |
|------|---------|---------|---------|------|---------|---------|---------|
| C1   | 2.26186 | 2.81845 | 0.32877 | C2   | 2.29250 | 2.78726 | 0.31658 |
| C3   | 2.26910 | 2.73147 | 0.47806 | C4   | 2.21369 | 2.70738 | 0.64655 |
| C5   | 2.18038 | 2.73666 | 0.64057 | C6   | 2.20642 | 2.79372 | 0.48874 |
| C7   | 2.30214 | 2.69823 | 0.47216 | C8   | 2.27140 | 2.63585 | 0.47087 |
| C9   | 3.10113 | 3.22745 | 0.47110 | C10  | 3.06334 | 3.16603 | 0.46276 |
| C11  | 3.07932 | 3.12778 | 0.62734 | C12  | 3.13447 | 3.15291 | 0.79798 |
| C13  | 3.17263 | 3.21431 | 0.80311 | C14  | 3.15657 | 3.25285 | 0.63985 |
| C15  | 3.03859 | 3.06216 | 0.62342 | C16  | 2.97674 | 3.03809 | 0.62304 |
| H17  | 2.28050 | 2.86160 | 0.20613 | H18  | 2.33401 | 2.80661 | 0.17463 |
| H19  | 2.19849 | 2.66719 | 0.79474 | H20  | 2.22348 | 2.61199 | 0.47039 |
| H21  | 3.08731 | 3.25525 | 0.33792 | H22  | 3.02235 | 3.14862 | 0.31737 |
| H23  | 3.14751 | 3.12534 | 0.94016 | H24  | 3.21352 | 3.23056 | 0.94610 |
| H25  | 2.95875 | 3.06753 | 0.62370 | N26  | 0.64737 | 0.82210 | 0.49671 |
| C27  | 0.68102 | 0.87650 | 0.64323 | C28  | 0.65211 | 0.90494 | 0.78678 |
| C29  | 0.58978 | 0.87738 | 0.78656 | H30  | 0.67703 | 0.94898 | 0.89431 |
| C31  | 0.56294 | 0.91184 | 0.93215 | O32  | 0.59380 | 0.95619 | 1.15832 |
| O33  | 0.51404 | 0.90221 | 0.84303 | H34  | 0.57500 | 0.97712 | 1.25334 |

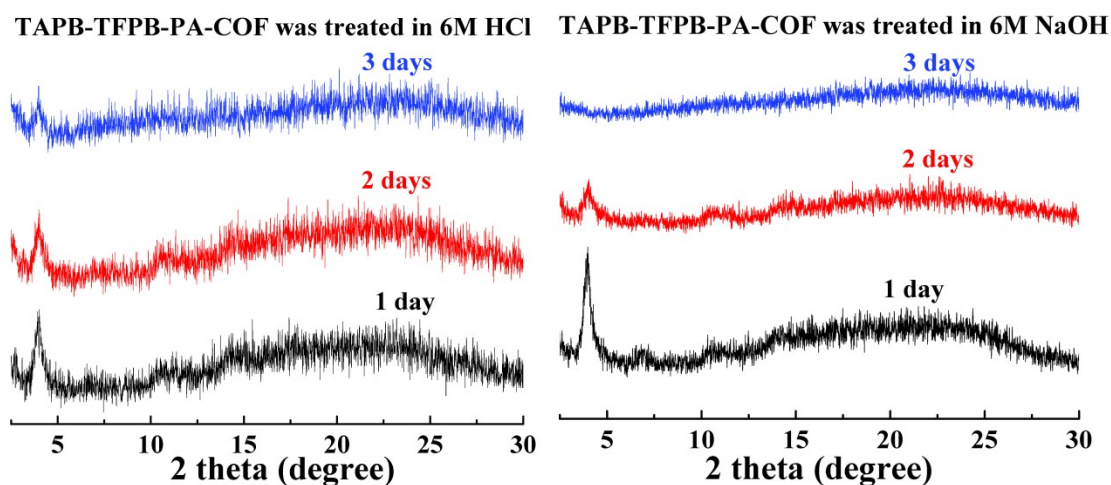

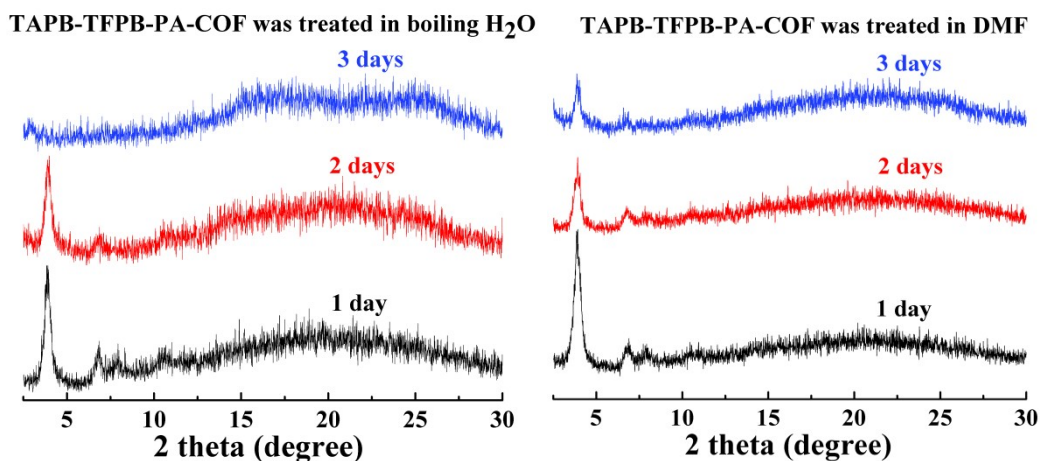

**Fig. S17** PXR D patterns of TAPB-TFPB-PA-COF treated in different solvents. No obvious weight loss for TAPB-TFPB-PA-COF was observed in boiling H<sub>2</sub>O and 6M NaOH, but there is about 4.8 % weight loss in DMF and 6M HCl after treatment.

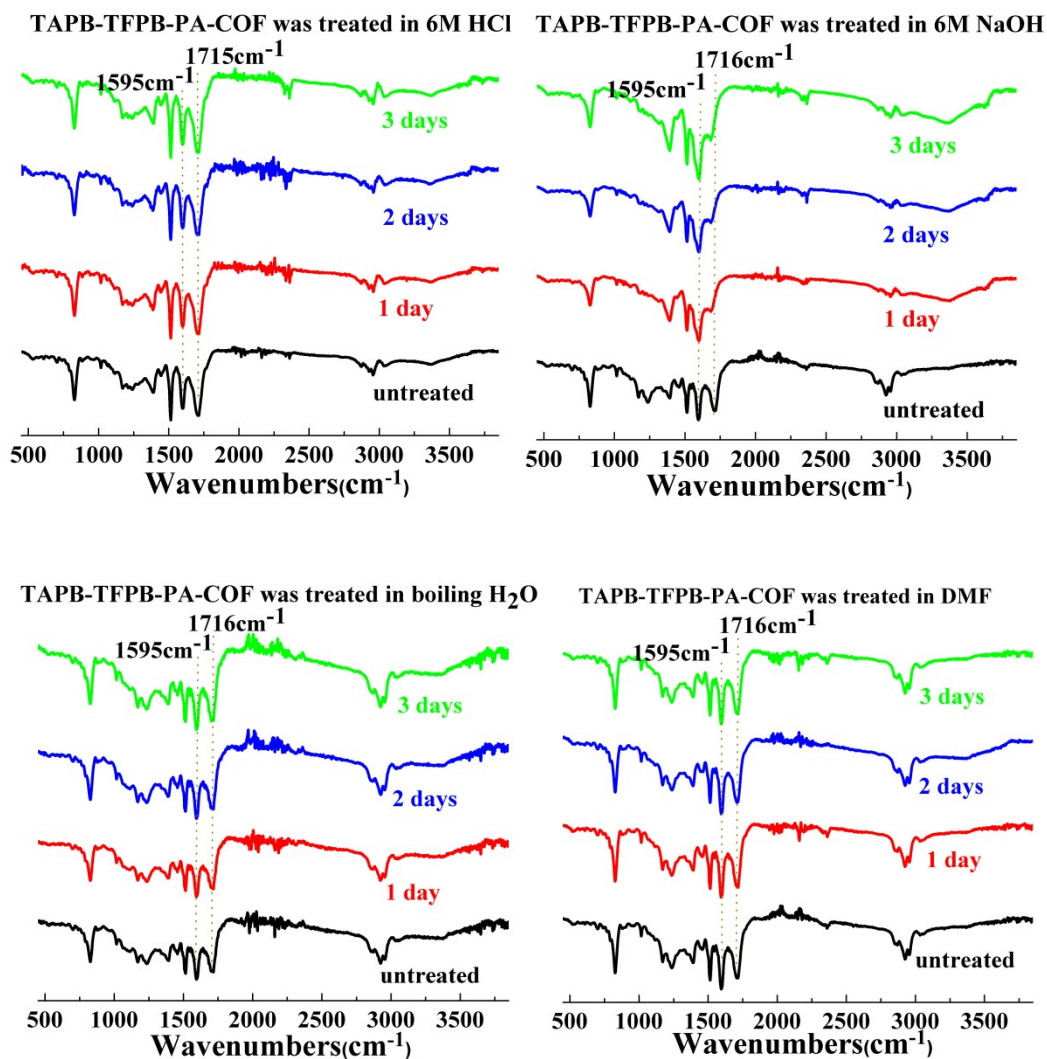

**Fig. S18** FT-IR spectra of TAPB-TFPB-PA-COF treated in different solvents.

### 3. Synthesis and characterization of TAPT-TFPB-PA-COF

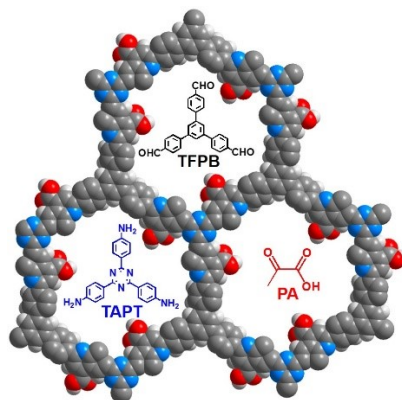

TAPT-TFPB-PA-COF

TAPT-TFPB-PA-COF was obtained by combination of TAPT, TFPB and PA via Doebner reaction. The synthesis procedure is the same as that of TAPB-DMTP-PA-COF. Yield, 89 %.

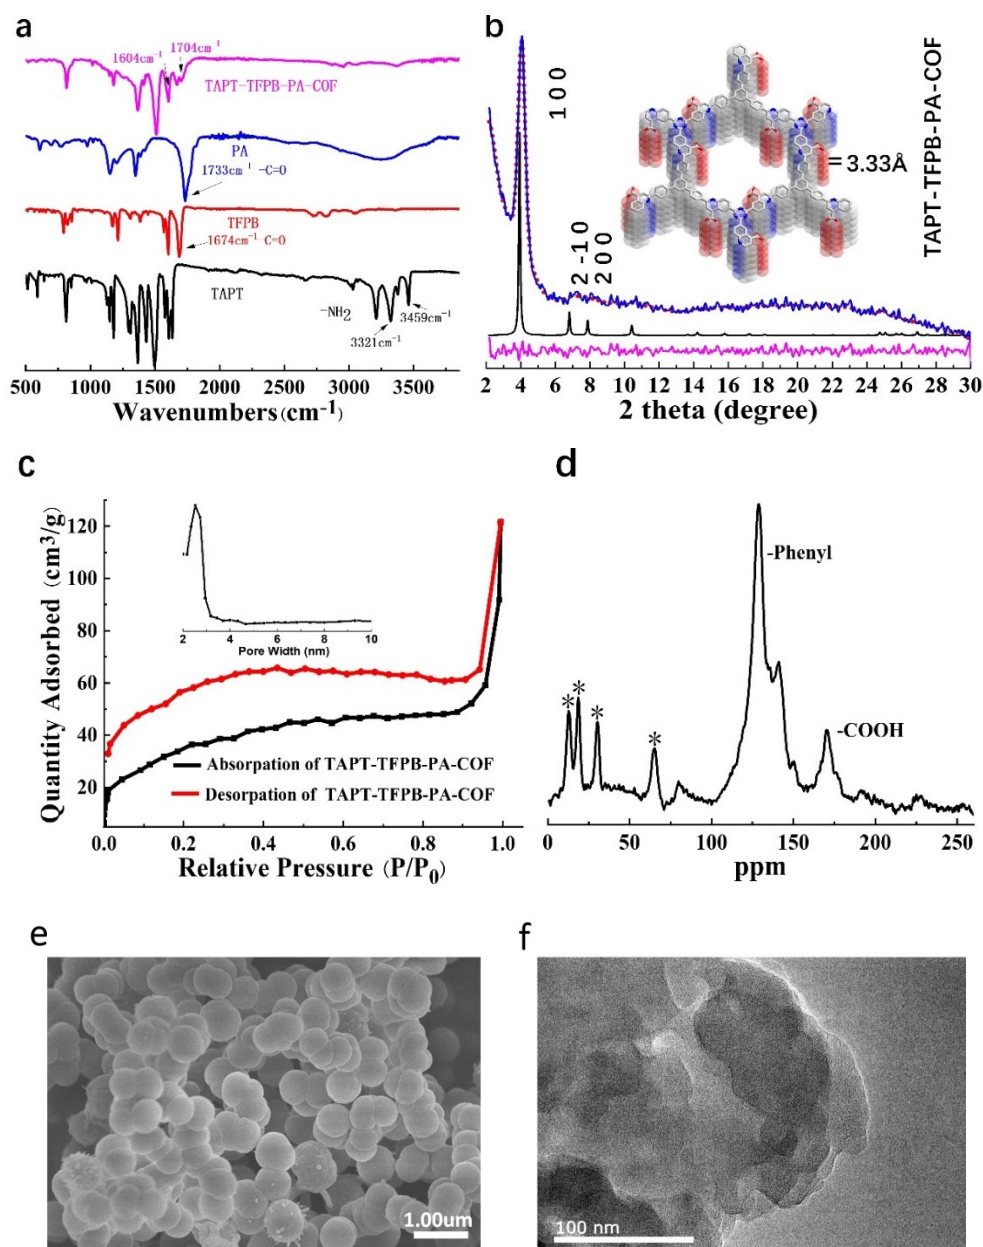

**Fig. S19** a) FT-IR spectra of **TAPT-TFPB-PA-COF** and its monomers. The characteristic peaks of amine (3321 and 3459  $\text{cm}^{-1}$ ), aldehyde (1674  $\text{cm}^{-1}$ ) and C=O of pyruvic acid (1733  $\text{cm}^{-1}$ ) disappeared after reaction, meanwhile the characteristic peaks at 1604 and 1704  $\text{cm}^{-1}$  appeared, demonstrating the formation of **TAPT-TFPB-PA-COF**. b) PXRD of **TAPT-TFPB-PA-COF**: comparison between the experimental (blue line) and Pawley refined (red dots) profiles, the simulated patterns for eclipsed (AA) stacking mode (black line) and the refinement difference (purple line). Inset is the simulated structure of **TAPT-TFPB-PA-COF**. c)  $\text{N}_2$  adsorption at 77 K revealed absorption amount of **TAPT-TFPB-PA-COF** is 121.56  $\text{cm}^3/\text{g}$ , and its surface area calculated based on the BET model was determined as 125.58  $\text{m}^2/\text{g}$ . Pore size distribution curve, calculated from Barrett-Joyner-Halenda analysis, showed that the pore width of **TAPT-TFPB-PA-COF** is centered at 2.1 nm, which is in good agreement with its simulated structure. d)  $^{13}\text{C}$  (CP/MAS) NMR spectrum. The peaks at 109-160 ppm and 170 ppm are respectively associated with aromatic and carboxylic acid carbons, the asterisks denote the solvent *n*-butyl alcohol. e) TEM image of **TAPT-TFPB-PA-COF**. f) SEM image of **TAPT-TFPB-PA-COF**.

The simulation method is the same as that of **TAPB-DMTP-PA-COF**. Atomistic coordinates for the AA-stacking mode of **TAPT-TFPB-PA-COF** (space group *P3*,  $a = b = 25.9242 \text{ \AA}$ ,  $c = 3.5944 \text{ \AA}$ ,  $\alpha = \beta = 90^\circ$  and  $\gamma = 120^\circ$ ,  $wRp = 3.95 \%$  and  $Rp = 2.85 \%$ ).

**Table S4.** Simulated structure of **TAPT-TFPB-PA-COF**

| Atom | x/a     | y/b     | z/c     | Atom | x/a     | y/b     | z/c     |
|------|---------|---------|---------|------|---------|---------|---------|
| C1   | 2.27573 | 2.82796 | 0.79349 | C2   | 2.30507 | 2.79524 | 0.80859 |
| C3   | 2.27350 | 2.73333 | 0.75241 | C4   | 2.21206 | 2.70485 | 0.67616 |
| C5   | 2.18233 | 2.73778 | 0.64403 | C6   | 2.21497 | 2.79982 | 0.71422 |
| C7   | 2.30469 | 2.69854 | 0.76692 | N8   | 2.27323 | 2.63821 | 0.76644 |
| C9   | 3.09521 | 3.22889 | 0.49599 | C10  | 3.05834 | 3.16703 | 0.48826 |
| C11  | 3.07769 | 3.12914 | 0.63613 | C12  | 3.13573 | 3.15563 | 0.78589 |
| C13  | 3.17325 | 3.21740 | 0.78125 | C14  | 3.15318 | 3.25460 | 0.63791 |
| C15  | 3.03775 | 3.06275 | 0.63523 | C16  | 2.97541 | 3.03712 | 0.63512 |
| H17  | 2.30007 | 2.87545 | 0.84501 | H18  | 2.35239 | 2.81808 | 0.87003 |
| H19  | 2.18807 | 2.65691 | 0.64835 | H20  | 3.07942 | 3.25700 | 0.37848 |
| H21  | 3.01546 | 3.14933 | 0.35455 | H22  | 3.15193 | 3.12917 | 0.91995 |
| H23  | 3.21714 | 3.23623 | 0.90422 | H24  | 2.95644 | 3.06575 | 0.63520 |
| N25  | 0.64517 | 0.81250 | 0.70810 | C26  | 0.67987 | 0.87165 | 0.63979 |
| C27  | 0.65298 | 0.90564 | 0.56140 | C28  | 0.59061 | 0.87905 | 0.55197 |
| H29  | 0.68049 | 0.95230 | 0.49086 | C30  | 0.56539 | 0.91663 | 0.42565 |
| O31  | 0.59806 | 0.97615 | 0.45123 | O32  | 0.51716 | 0.89490 | 0.27216 |
| H33  | 0.58169 | 0.99951 | 0.35109 |      |         |         |         |



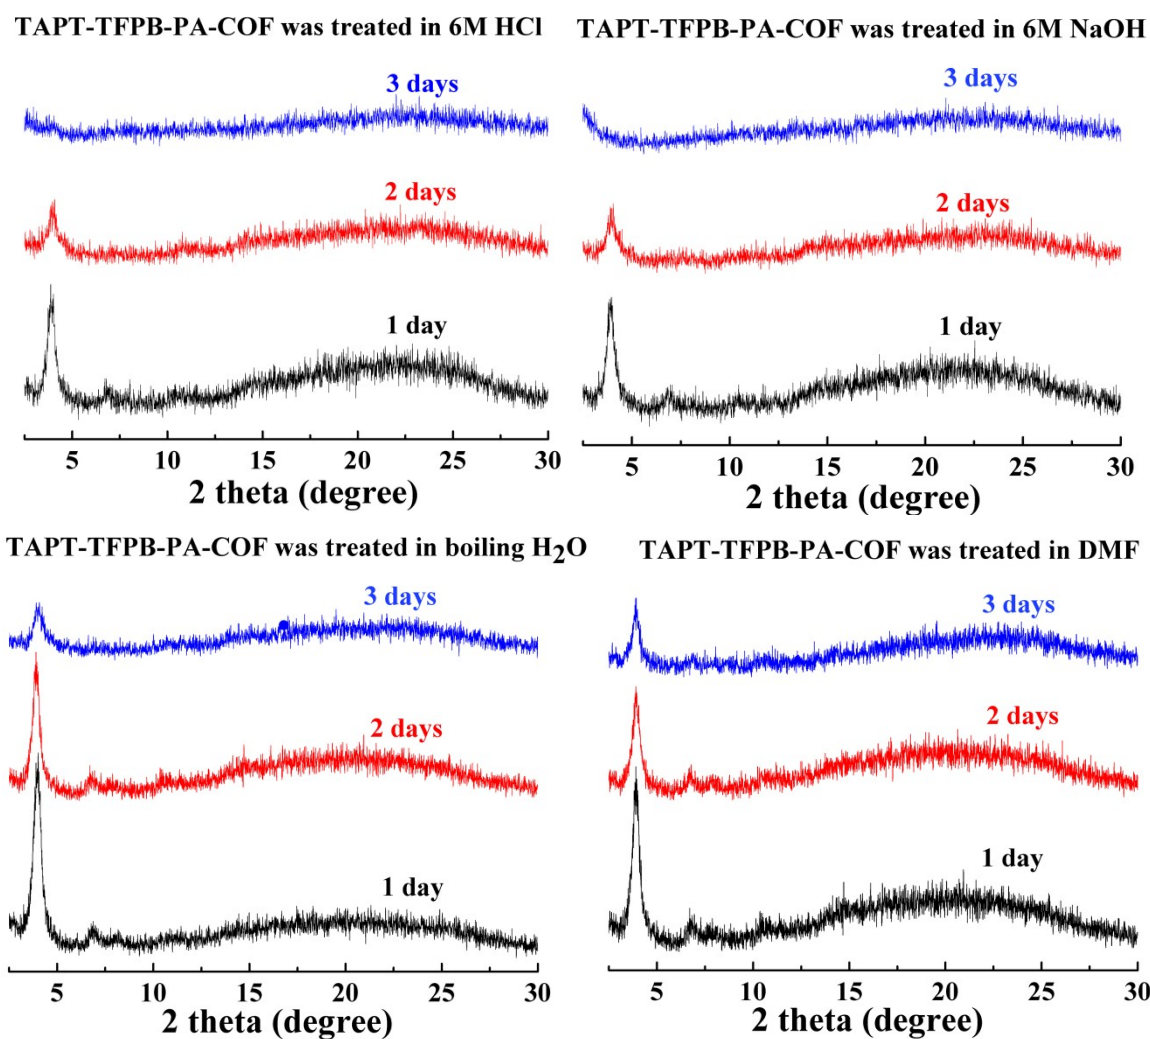

**Fig. S20** PXRD patterns of TAPT-TFPB-PA-COF treated in different solvents. No obvious weight loss for TAPT-TFPB-PA-COF treated by boiling H<sub>2</sub>O and 6M NaOH was observed, but there is about 5.5 % weight loss in DMF and 6M HCl after treatment.

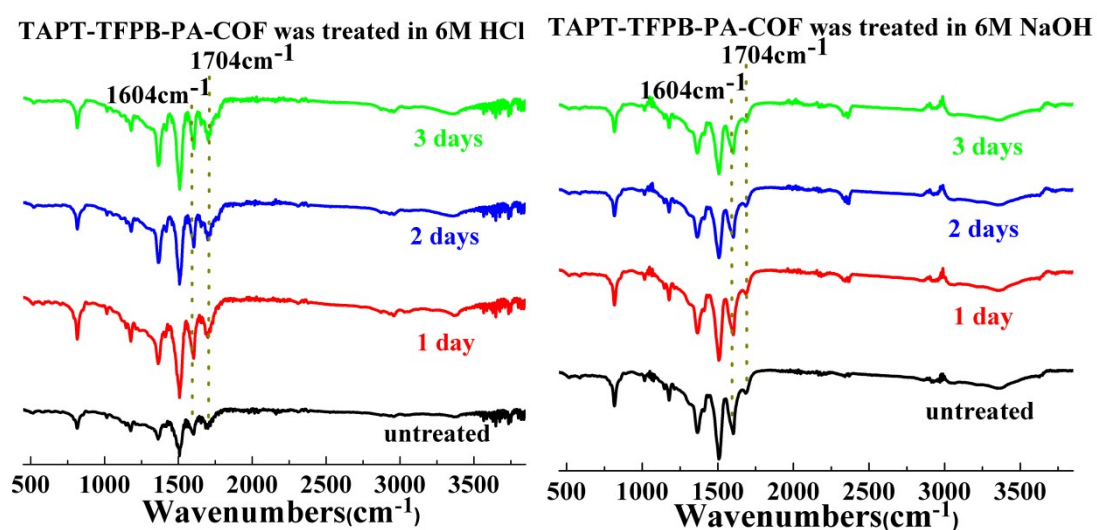

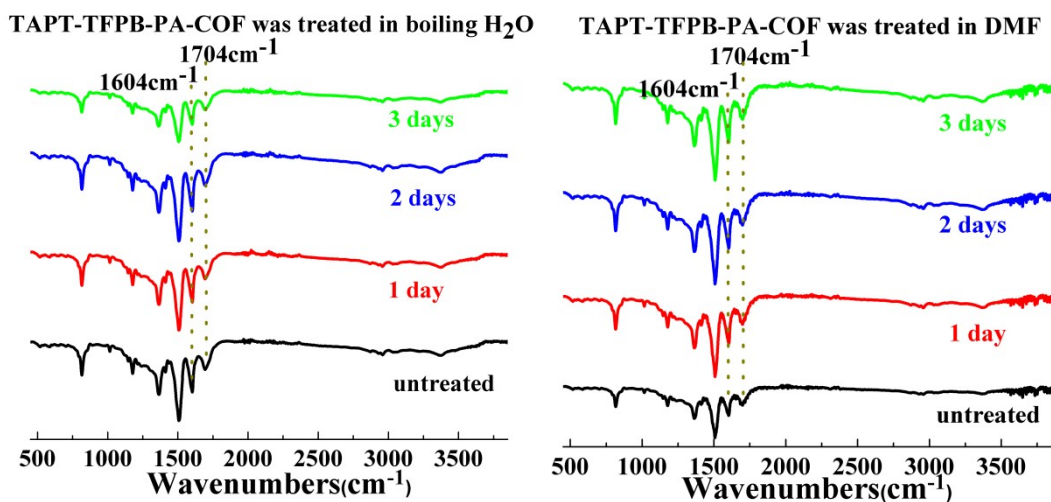

Fig. S21 FT-IR spectra of TAPT-TFPB-PA-COF treated in different solvents.

#### 4. Synthesis and characterization of TAPB-TP-PA-COF

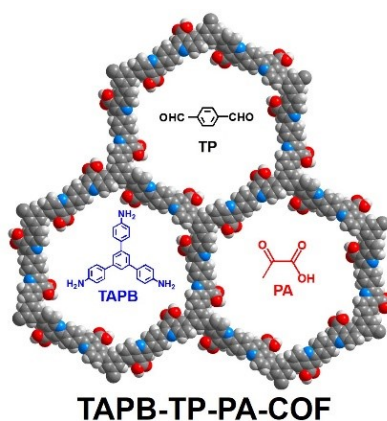

TAPB-TP-PA-COF was obtained by combination of TATP, TFPB and PA via Doebner reaction. The synthesis procedure is the same as that of TAPB-DMTP-PA-COF. Yield, 85 %.

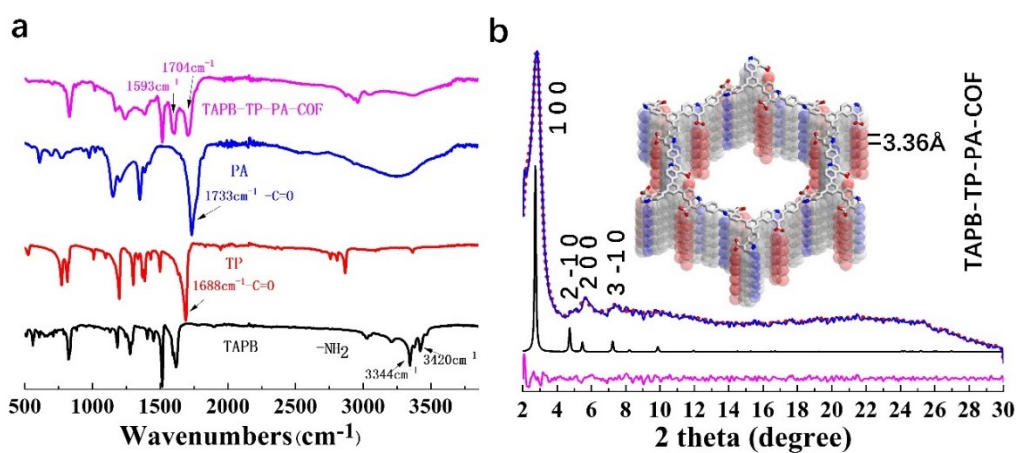

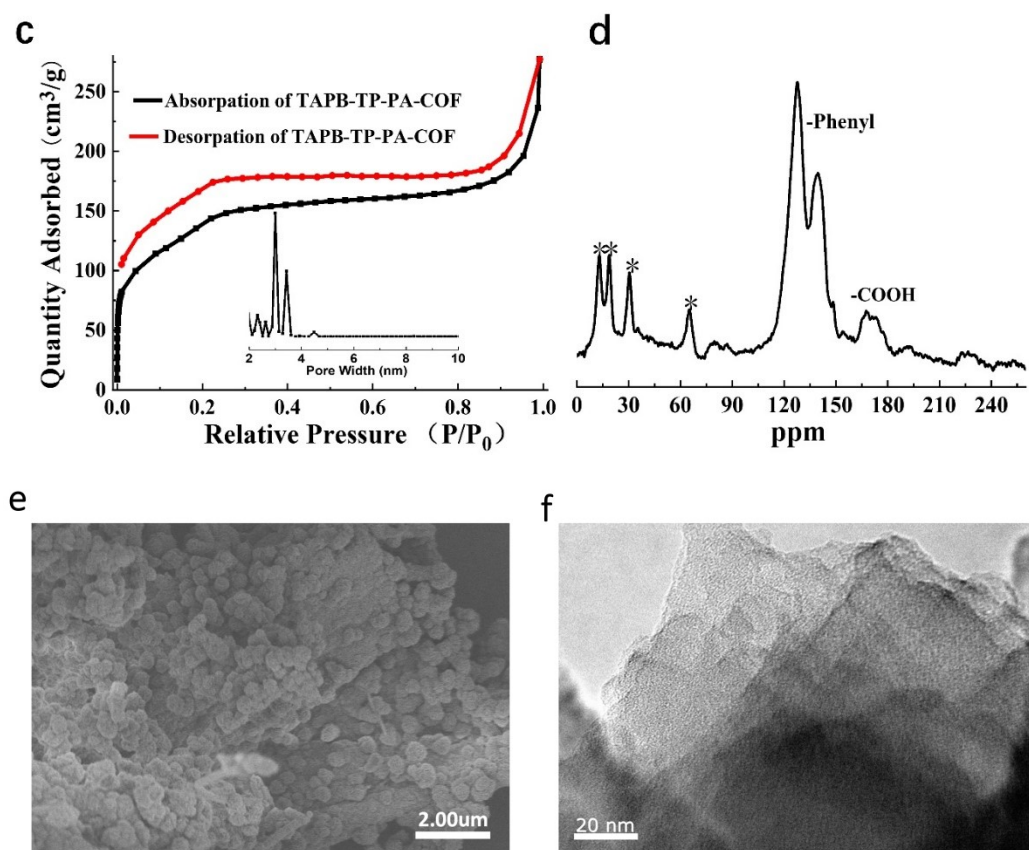

**Fig. S22** a) FT-IR spectra of **TAPB-TP-PA-COF** and its monomers. The characteristic peaks of amine ( $3344$  and  $3420\text{ cm}^{-1}$ ), aldehyde ( $1688\text{ cm}^{-1}$ ) and  $\text{C}=\text{O}$  of pyruvic acid ( $1733\text{ cm}^{-1}$ ) in the monomers disappeared after reaction, meanwhile the characteristic peaks at  $1593$  and  $1704\text{ cm}^{-1}$  appeared, demonstrating the formation of **TAPB-TP-PA-COF**. b) PXRD of **TAPB-TP-PA-COF**: comparison between the experimental (blue line) and Pawley refined (red dots) profiles, the simulated patterns for eclipsed (AA) stacking mode (black line) and the refinement difference (purple line). Inset is the simulated structure of **TAPB-TP-PA-COF**. c)  $\text{N}_2$  adsorption at  $77\text{ K}$  revealed absorption amount of **TAPB-TP-PA-COF** is  $277.07\text{ cm}^3/\text{g}$ , and its surface area calculated on basis of the BET model was determined as  $482.35\text{ m}^2/\text{g}$ . Pore size distribution curve, calculated from Barrett-Joyner-Halenda analysis, showed that the pore width of **TAPB-TP-PA-COF** is centered at  $3.0\text{ nm}$ , which is in good agreement with their simulated structure. d)  $^{13}\text{C}$  (CP/MAS) NMR spectrum. The peaks at  $109\text{-}160\text{ ppm}$  and  $167\text{ ppm}$  are respectively associated with aromatic and carboxylic acid carbons, the asterisks denote the solvent *n*-butyl alcohol. e) TEM image of **TAPB-TP-PA-COF**. f) SEM image of **TAPB-TP-PA-COF**.

The simulation method is the same as that of **TAPB-DMTP-PA-COF**. Atomistic coordinates for the AA-stacking mode of **TAPB-TP-PA-COF** (space group  $P6$ ,  $a = b = 37.2693\text{ \AA}$ ,  $c = 3.6909\text{ \AA}$ ,  $\alpha = \beta = 90^\circ$  and  $\gamma = 120^\circ$ ,  $wRp = 2.94\%$  and  $Rp = 2.15\%$ ).

**Table S5.** Simulated structure of **TAPB-TP-PA-COF**

| Atom | x/a     | y/b     | z/c     | Atom | x/a     | y/b     | z/c     |
|------|---------|---------|---------|------|---------|---------|---------|
| C1   | 0.35768 | 0.64720 | 0.65761 | C2   | 0.37649 | 0.69064 | 0.65769 |
| C3   | 0.38333 | 0.62655 | 0.66159 | C4   | 0.36817 | 0.58687 | 0.50826 |

|     |         |         |         |     |         |         |         |
|-----|---------|---------|---------|-----|---------|---------|---------|
| C5  | 0.39095 | 0.56602 | 0.52823 | C6  | 0.43154 | 0.58758 | 0.67159 |
| C7  | 0.44717 | 0.62721 | 0.81604 | C8  | 0.42304 | 0.64612 | 0.81957 |
| N9  | 0.45579 | 0.56999 | 0.66988 | C10 | 0.44274 | 0.53146 | 0.53606 |
| C11 | 0.47174 | 0.51495 | 0.53913 | C12 | 0.45740 | 0.47214 | 0.54528 |
| C13 | 0.48530 | 0.45745 | 0.54351 | H14 | 0.40984 | 0.70916 | 0.65909 |
| H15 | 0.33970 | 0.57351 | 0.35669 | C16 | 0.37560 | 0.52494 | 0.39968 |
| H17 | 0.47790 | 0.64316 | 0.93382 | H18 | 0.43556 | 0.67586 | 0.95216 |
| C19 | 0.40237 | 0.50853 | 0.39755 | H20 | 0.47311 | 0.42429 | 0.54410 |
| H21 | 0.39154 | 0.47791 | 0.28763 | C22 | 0.66816 | 0.50271 | 0.28589 |
| O23 | 0.67660 | 0.53136 | 0.07857 | O24 | 0.70015 | 0.49815 | 0.43288 |
| H25 | 0.72843 | 0.51941 | 0.33727 | H26 | 0.42468 | 0.44973 | 0.55715 |

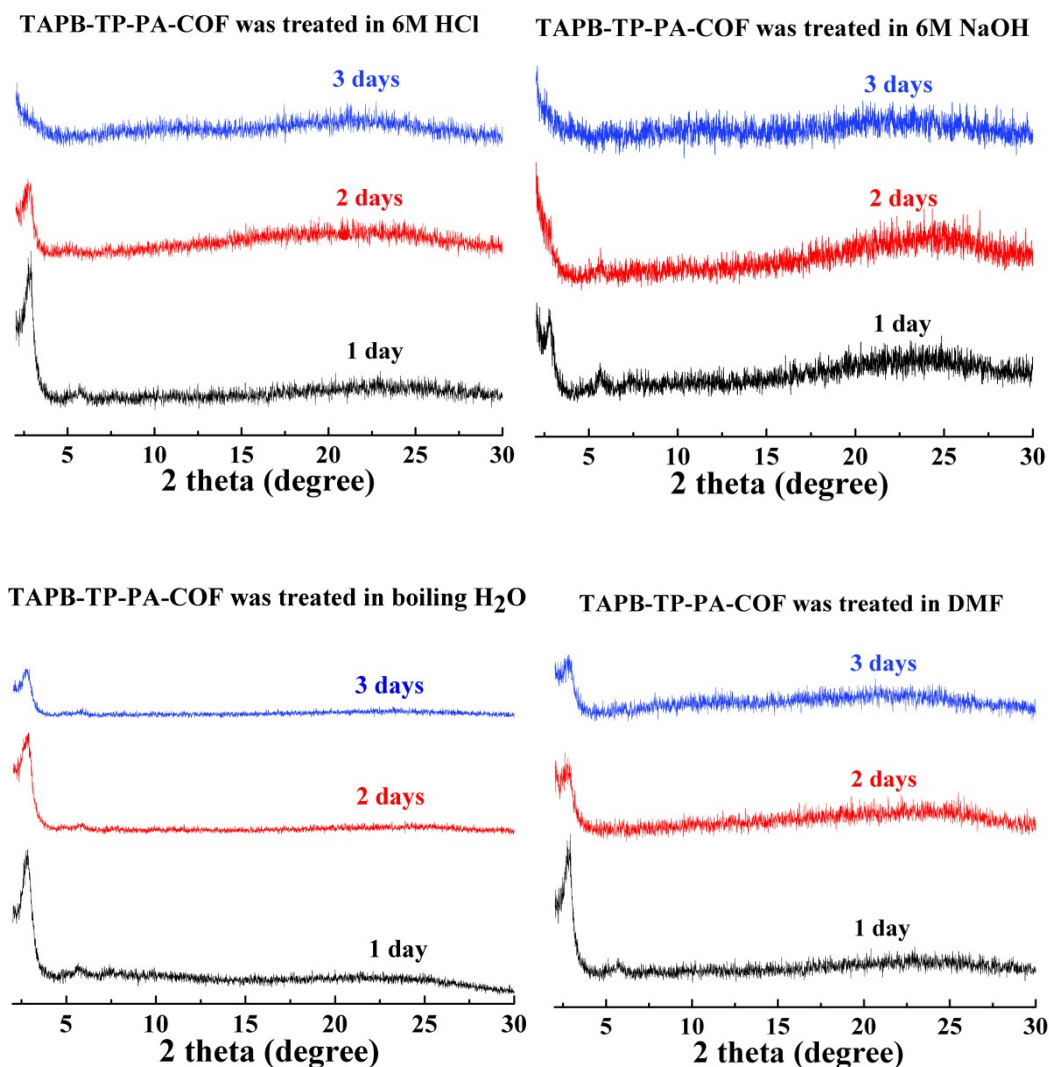

**Fig. S23** PXRD patterns of TAPB-TP-PA-COF treated in different solvents. No obvious weight loss for TAPB-TP-PA-COF treated in boiling H<sub>2</sub>O and 6M NaOH was observed, but there is about 7.3 % weight loss in DMF and 6M HCl after treatment.



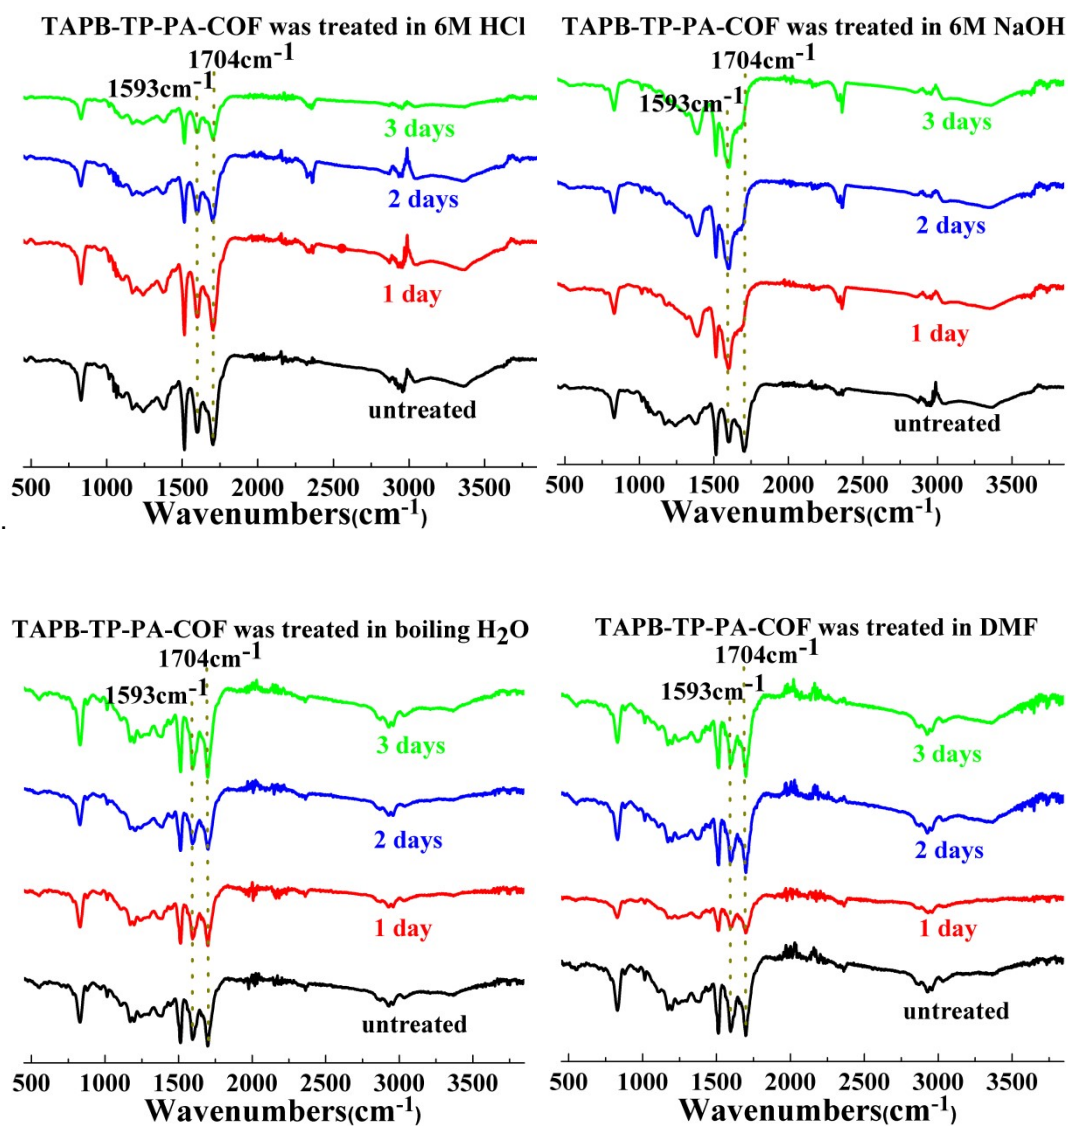

Fig. S24 FT-IR spectra of TAPB-TP-PA-COF treated in different solvents.

### 5. Synthesis and characterization of TAPT-TP-PA-COF

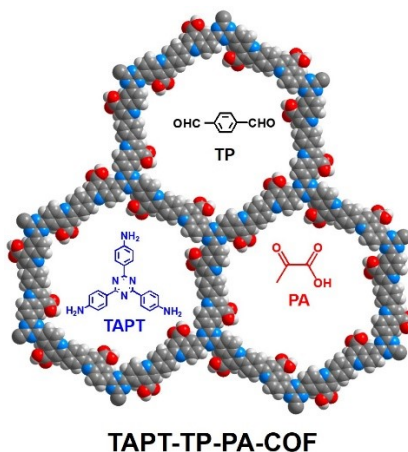

**TAPT-TP-PA-COF** was obtained by combination of TAPT, TFPB and PA via Doebner reaction. The synthesis procedure is the same as that of **TAPB-DMTP-PA-COF**. Yield, 87 %.

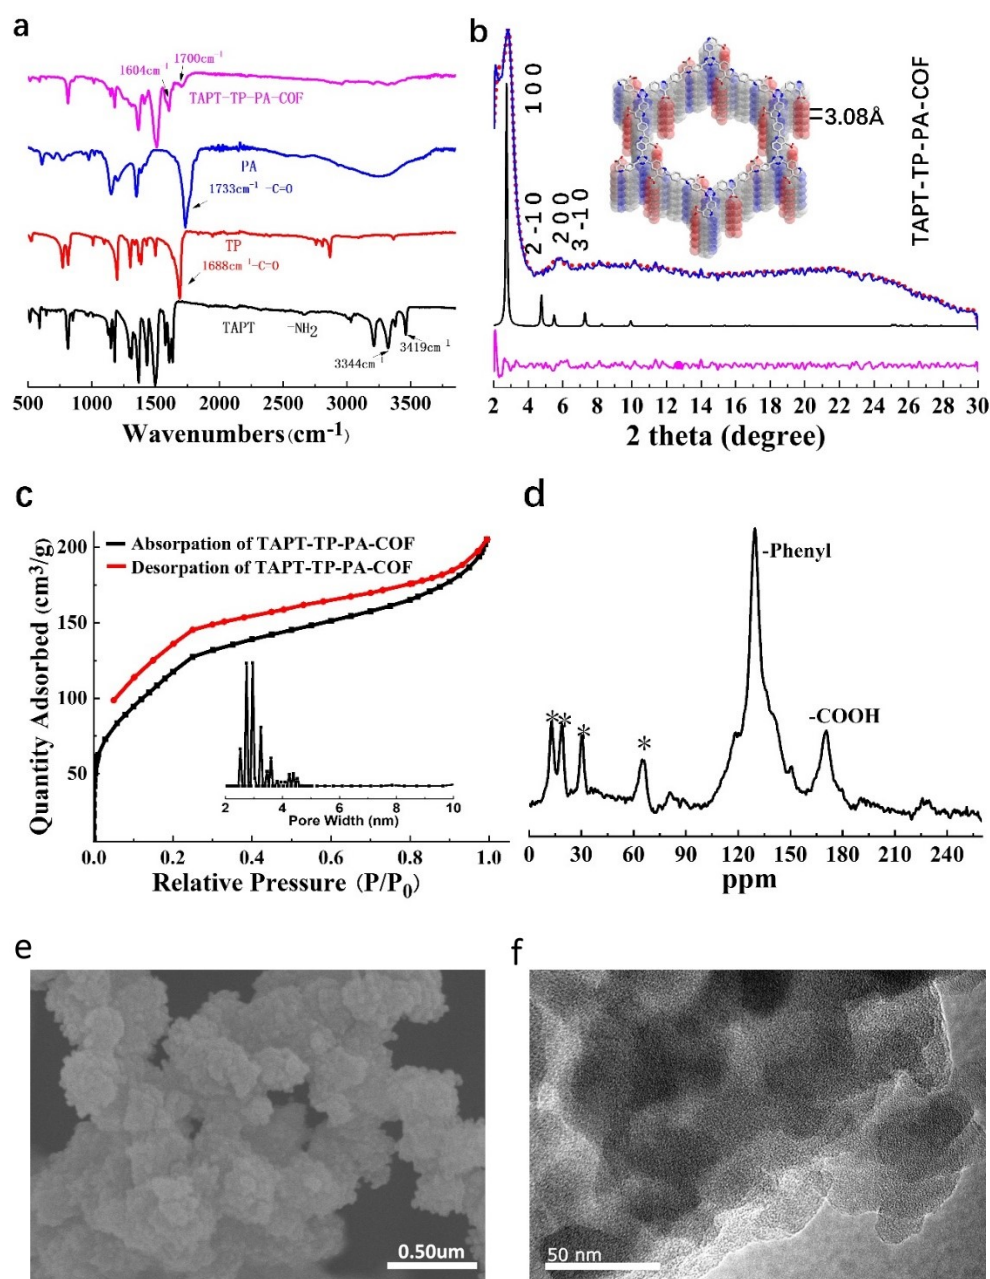

**Fig. S25** a) FT-IR spectra of **TAPT-TP-PA-COF** and its monomers. The characteristic peaks of amine ( $3344$  and  $3419\text{ cm}^{-1}$ ), aldehyde ( $1688\text{ cm}^{-1}$ ) and C=O of pyruvic acid ( $1733\text{ cm}^{-1}$ ) in the monomers disappeared after reaction, meanwhile the characteristic peaks at  $1604$  and  $1700\text{ cm}^{-1}$  appeared, demonstrating the formation of **TAPT-TP-PA-COF**. b) PXRD of **TAPT-TP-PA-COF**: comparison between the experimental (blue line) and Pawley refined (red dots) profiles, the simulated patterns for eclipsed (AA) stacking mode (black line) and the refinement difference (purple line). Inset is simulated structure of **TAPT-TP-PA-COF**. c)  $\text{N}_2$  adsorption at  $77\text{ K}$  revealed absorption amount of **TAPT-TP-PA-COF** is  $205.22\text{ cm}^3/\text{g}$ , and its surface area calculated on basis of the BET model was determined as  $438.33\text{ m}^2/\text{g}$ . Pore size distribution curve, calculated from Barrett-Joyner-Halenda analysis, showed that the pore width of **TAPT-TP-PA-COF** is centered at  $3.1\text{ nm}$ , which is in good agreement with their simulated structure. d)  $^{13}\text{C}$  (CP/MAS) NMR spectrum. The peaks at  $109\text{-}160\text{ ppm}$  and  $170\text{ ppm}$  are respectively associated with aromatic and carboxylic acid carbons, the asterisks denote the solvent *n*-butyl alcohol. e) TEM image of **TAPT-TP-PA-COF**. f) SEM image of **TAPT-TP-PA-COF**.

The simulation method is the same as that of **TAPB-DMTP-PA-COF**. Atomistic coordinates for the AA-stacking mode of **TAPT-TP-PA-COF** (space group  $P6$ ,  $a = b = 37.0544$  Å,  $c = 3.5489$  Å,  $\alpha = \beta = 90^\circ$  and  $\gamma = 120^\circ$ ,  $wRp = 2.99$  % and  $Rp = 2.15$  %).

**Table S6.** Simulated structure of **TAPT-TP-PA-COF**

| Atom | x/a     | y/b     | z/c     | Atom | x/a     | y/b     | z/c     |
|------|---------|---------|---------|------|---------|---------|---------|
| C1   | 0.35693 | 0.64802 | 0.59364 | N2   | 0.37532 | 0.69011 | 0.59410 |
| C3   | 0.38260 | 0.62762 | 0.60311 | C4   | 0.36479 | 0.58506 | 0.51447 |
| C5   | 0.38841 | 0.56475 | 0.53588 | C6   | 0.43104 | 0.58876 | 0.63521 |
| C7   | 0.44878 | 0.63104 | 0.71917 | C8   | 0.42484 | 0.65043 | 0.70415 |
| N9   | 0.45548 | 0.57116 | 0.64521 | C10  | 0.44116 | 0.53050 | 0.56026 |
| C11  | 0.47084 | 0.51430 | 0.57007 | C12  | 0.45729 | 0.47137 | 0.57874 |
| C13  | 0.48604 | 0.45741 | 0.57543 | H14  | 0.33289 | 0.56893 | 0.41893 |
| C15  | 0.37200 | 0.52181 | 0.45195 | H16  | 0.48134 | 0.64880 | 0.79745 |
| H17  | 0.43918 | 0.68325 | 0.77474 | C18  | 0.39917 | 0.50551 | 0.45835 |
| H19  | 0.47448 | 0.42416 | 0.57603 | H20  | 0.38709 | 0.47332 | 0.38052 |
| C21  | 0.67269 | 0.50751 | 0.35995 | O22  | 0.68207 | 0.53884 | 0.17705 |
| O23  | 0.70441 | 0.50115 | 0.49133 | H24  | 0.73230 | 0.52518 | 0.40948 |
| H25  | 0.42463 | 0.44817 | 0.59261 |      |         |         |         |

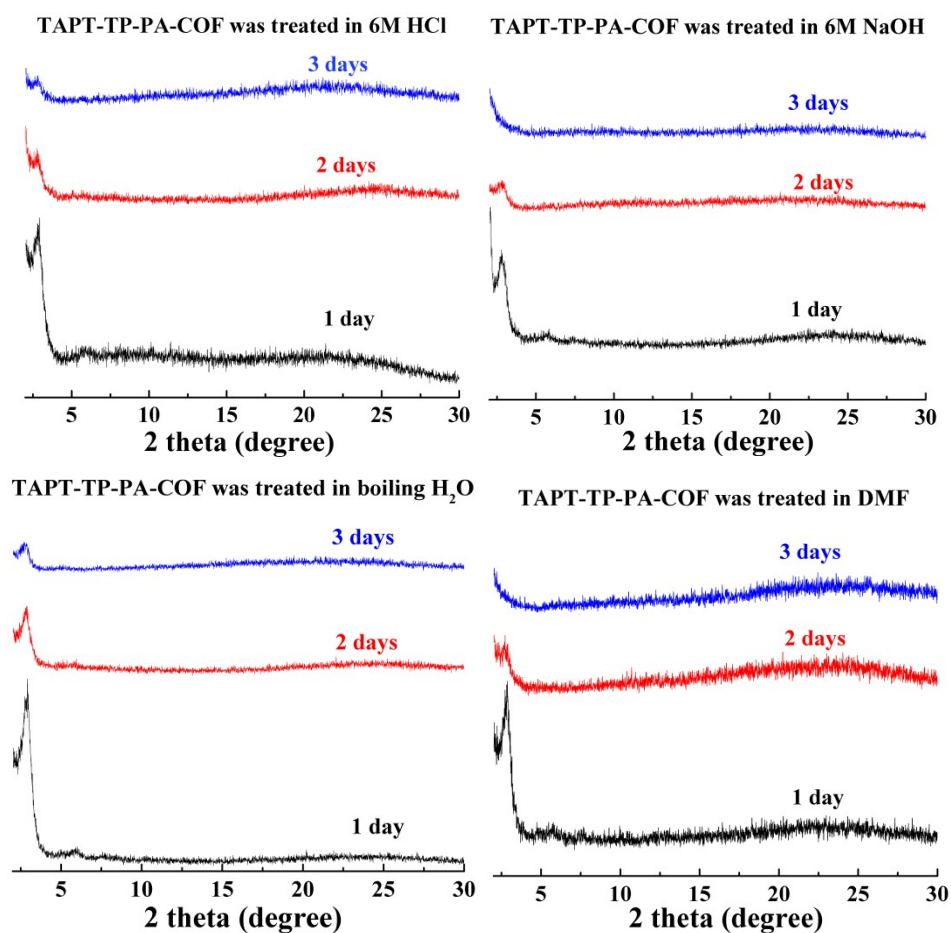

**Fig. S26** PXRD patterns of **TAPT-TP-PA-COF** treated in different solvents. No obvious weight loss for **TAPT-TP-PA-COF** treated by boiling H<sub>2</sub>O and 6M NaOH was observed, but there is about 6.3 % weight loss in DMF and 6M HCl after treatment.

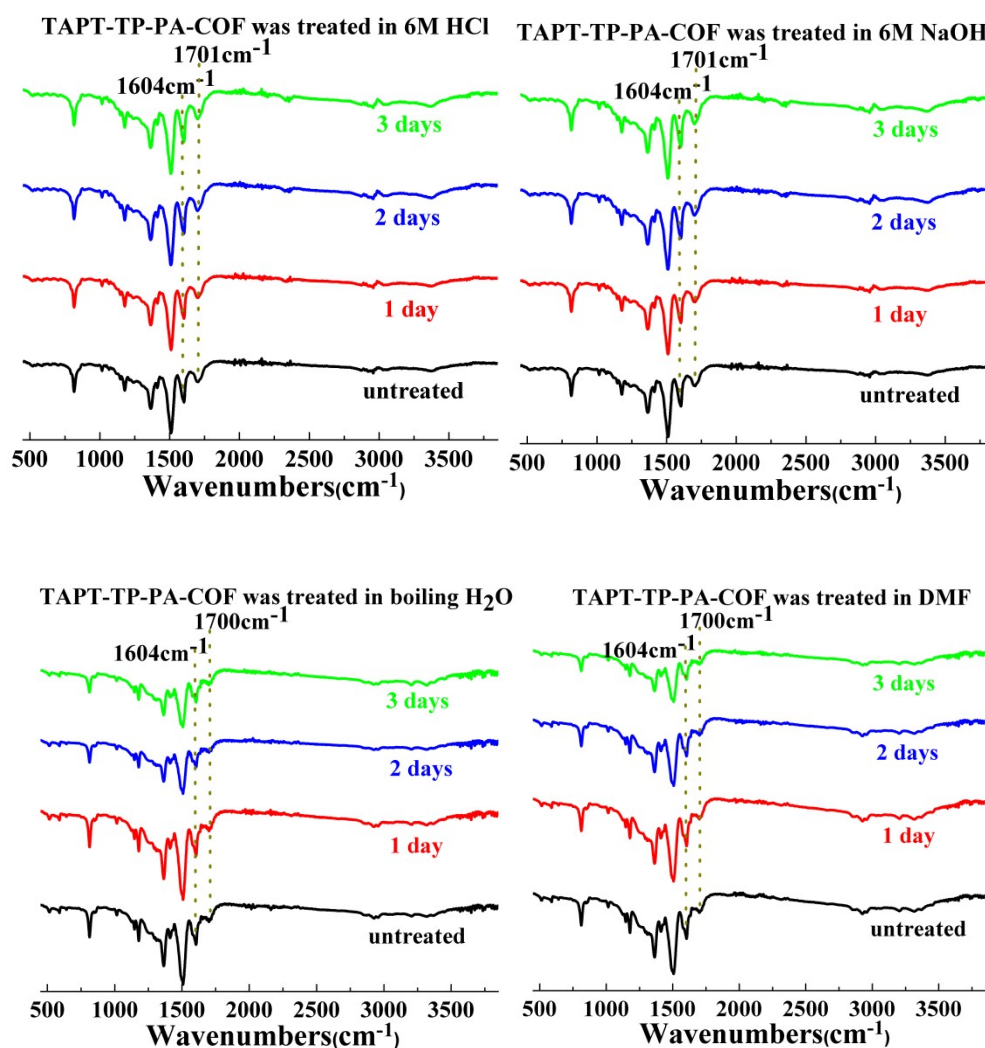

**Fig. S27** FT-IR spectra of **TAPT-TP-PA-COF** treated in different solvents.

#### IV. Synthesis and characterization of benzylidenemalononitrile

A mixture of benzaldehyde dimethyl acetal (1.5 mL, 10.0 mmol), malononitrile (0.72g, 11.0 mmol), and **TAPB-DMTP-PA-COF** (30 mg, 3 mol %) was stirred for 5 h at 75°C in air to afford the corresponding benzylidenemalononitrile.



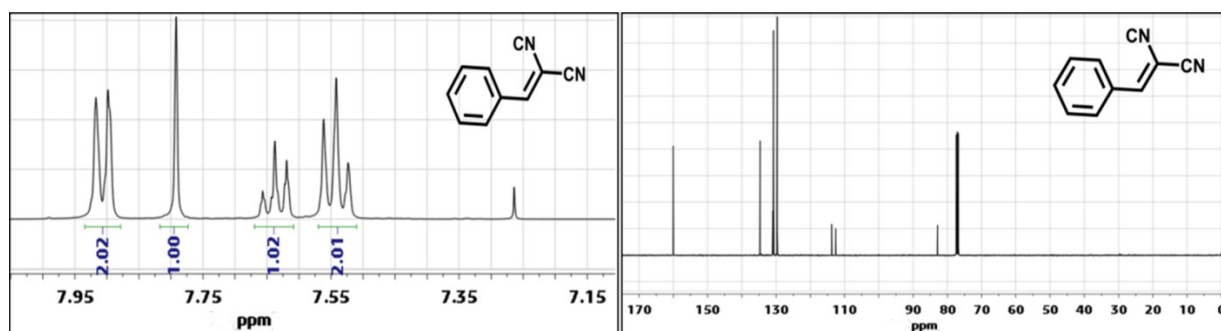

**Fig. S28**  $^1\text{H}$  NMR and  $^{13}\text{C}$  NMR spectra (400 MHz,  $\text{CDCl}_3$ ) of benzylidenemalononitrile.

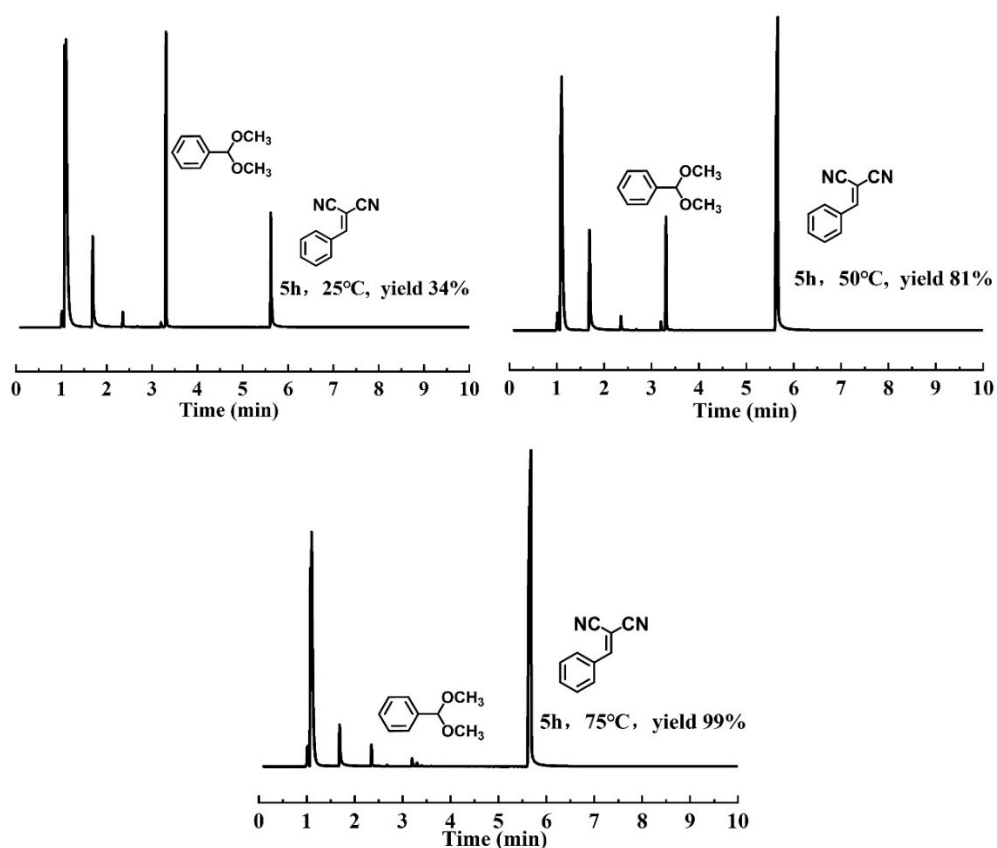

**Fig. S29** GC analysis of the **TAPB-DMTP-PA-COF**-catalysed deacetalization-Knoevenagel condensation at difference temperature: the relationship between time and yield.

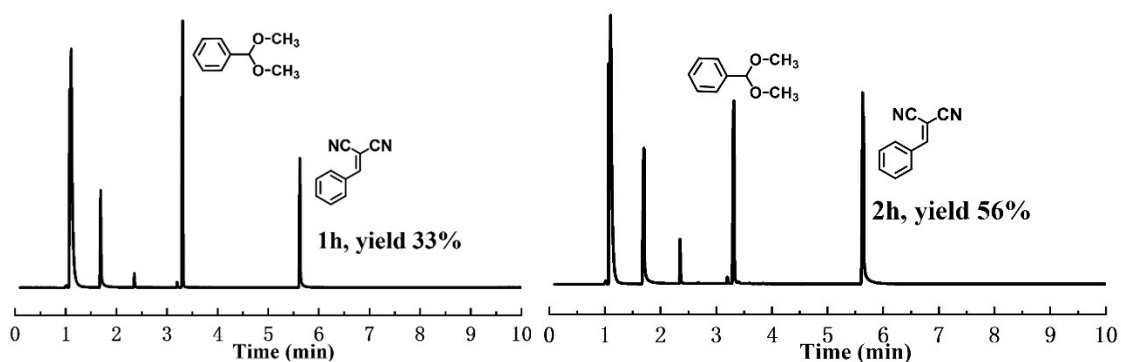

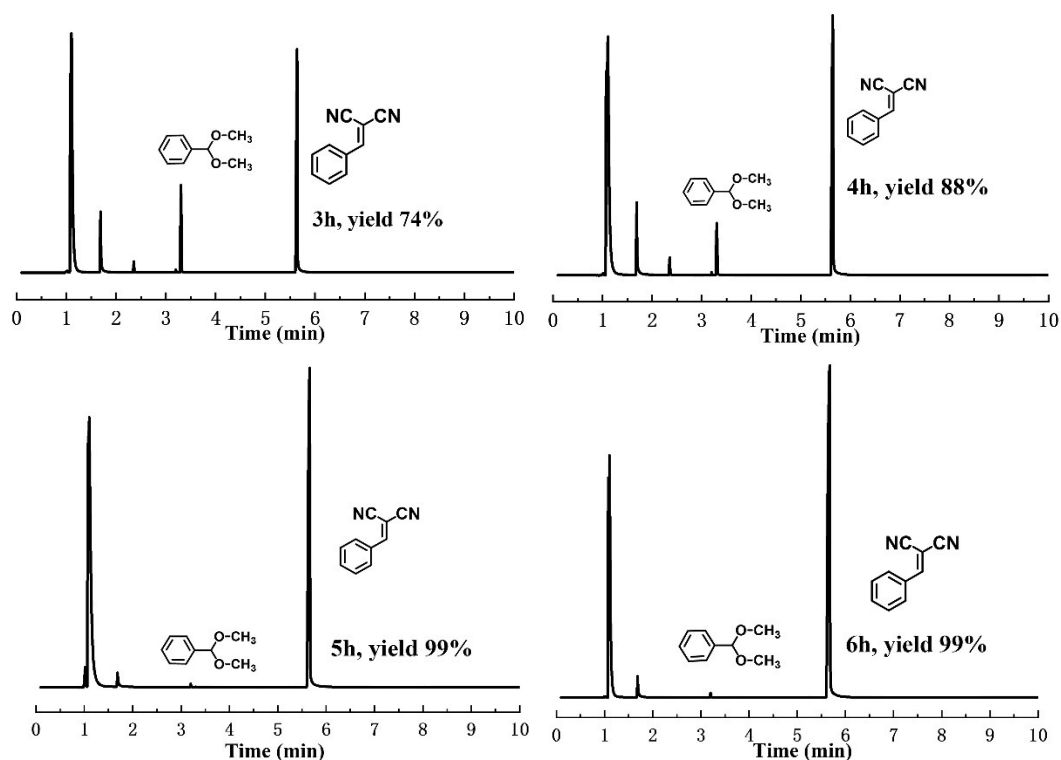

**Fig. S30** GC analysis of the **TAPB-DMTP-PA-COF**-catalysed deacetalization-Knoevenagel condensation: the relationship between time and yield.

## V. Leaching test

The solid catalyst **TAPB-DMTP-PA-COF** was isolated from the hot reaction solution after reaction ignition for 2 h, whereas the filtrate was transferred to a new vial and the reaction was carried out under the same conditions for additional 4 h under the same conditions. No significant conversion for the product was detected.

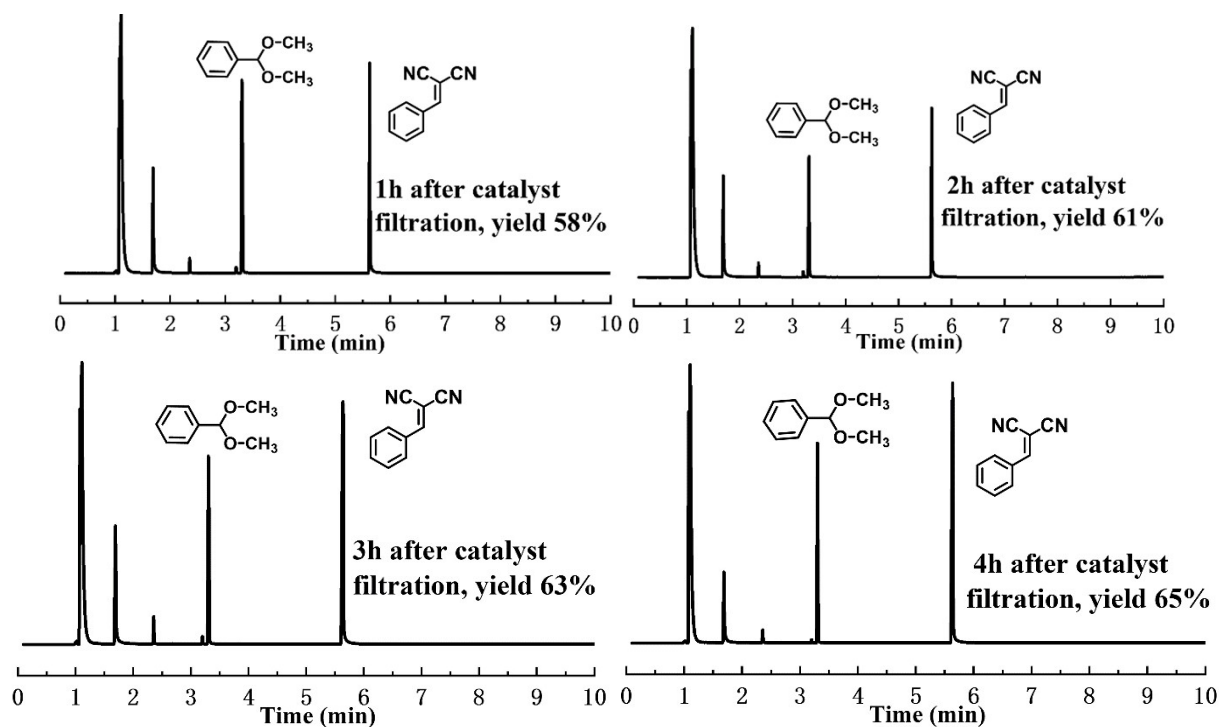

**Fig. S31** The GC analysis after removing the COF catalyst.

## VI. Catalyst regeneration

After reaction, **TAPB-DMTP-PA-COF** was recovered by centrifugation, then washed with ethanol (3.0 mL) and dichloromethane (3.0 mL) (3 times), and dried at 90 °C in vacuum for the next run under the same reaction conditions.

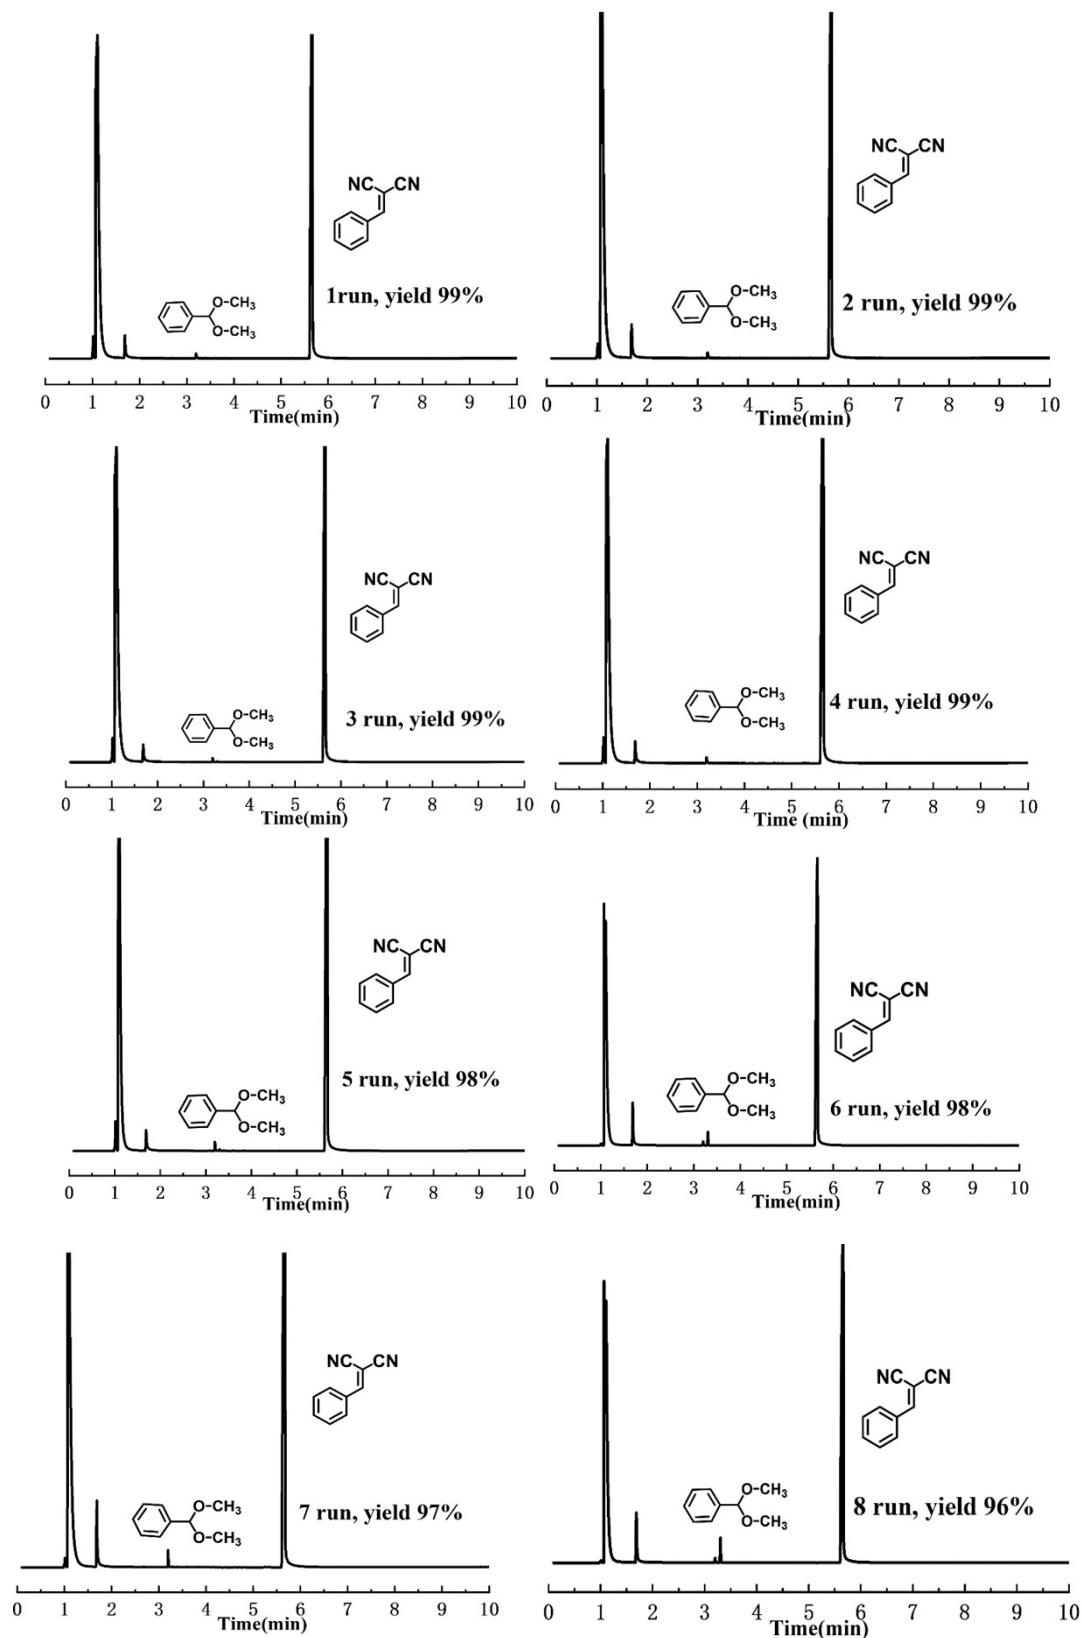

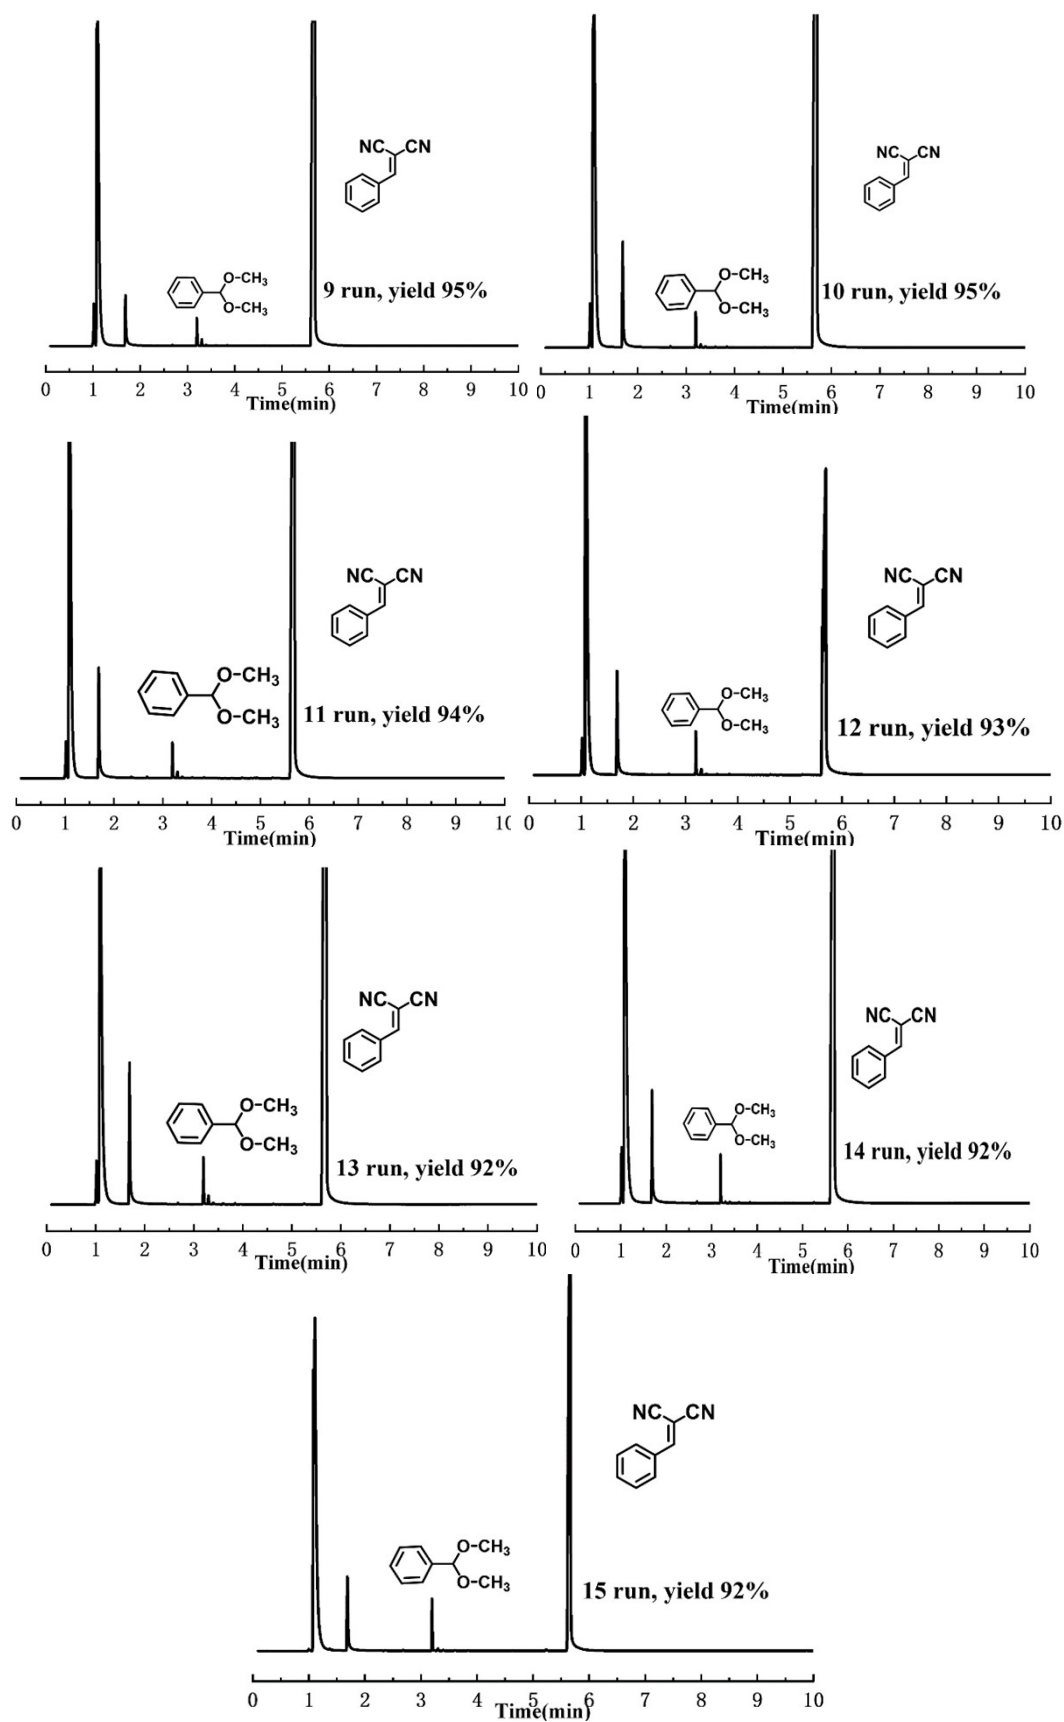

**Fig. S32.** GC results of the **TAPB-DMTP-PA-COF**-catalysed deacetalization-Knoevenagel condensation for fifteen runs.

## VII. Comparison of TAPB-DMTP-PA-COF with the reported catalysts

**Table S7.** Comparison of **TAPB-DMTP-PA-COF** with the reported catalysts for one-pot cascade deacetalization–Knoevenagel condensation.

| catalyst                                                                                       | conditions                          | recycle   | yield     | ref.             |
|------------------------------------------------------------------------------------------------|-------------------------------------|-----------|-----------|------------------|
| MCM-41-P1                                                                                      | MeCN, toluene / 80 °C / 5h          | 3         | 90        | 1                |
| HisAA-220                                                                                      | MeCN / 80 °C / 4h                   | 5         | 77        | 2                |
| MIL-101(Cr)@CS                                                                                 | MeCN / 80 °C / 12 h                 | 5         | 99        | 3                |
| Pd@N-ZDC@PTA-mSiO <sub>2</sub>                                                                 | DMF / 80 °C / 24 h                  | 5         | >99       | 4                |
| [Zn <sub>2</sub> (L) <sub>2</sub> (H <sub>2</sub> O) <sub>4</sub> ]·2(H <sub>2</sub> O)·6(DMF) | DMF / 80 °C / 3h                    | 5         | 93.5      | 5                |
| PCN-905-SO <sub>2</sub>                                                                        | Toluene / 90 °C / 1 h.              | 0         | 95.5      | 6                |
| Zr <sub>12</sub> BDC-NH <sub>2</sub>                                                           | CDCl <sub>3</sub> / 55 °C / 24 h.   | 3         | 91.8      | 7                |
| PCN-222-Co@TpPa-1                                                                              | DMSO-d <sub>6</sub> / 50 °C / 10 h. | 5         | 99.3      | 8                |
| Yb-BDC-NH <sub>2</sub>                                                                         | DMSO-d <sub>6</sub> / 50 °C / 24 h  | 4         | 97        | 9                |
| [Zn <sub>24</sub> (BDPO) <sub>12</sub> (DMF) <sub>12</sub> ]·6DMF·52H <sub>2</sub> O           | Toluene / 90 °C / 3 h               | 5         | 99        | 10               |
| BNP-2.1                                                                                        | Toluene / 80 °C / 24 h              | 4         | 98.5      | 11               |
| 3D DL-COF-1                                                                                    | CDCl <sub>3</sub> / r t / 20 h      | 3         | 98        | 12               |
| MIL-101-AB-0.32                                                                                | DMF, 1,2,4-trichlorobenzene/ 363 K  | 3         | 99        | 13               |
| Pickering Emulsion Droplets                                                                    | Water, toluene / 60 °C / 19 h       | 4         | 75        | 14               |
| 2,3-DhaTph                                                                                     | Toluene / 80 °C / 1h                | 5         | 96        | 15               |
| PPAF-SO <sub>3</sub> H-NH <sub>2</sub>                                                         | Toluene / 90°C / 1 h                | 7         | 87        | 16               |
| LZSM-5-AT-OH <sup>-</sup>                                                                      | MeCN / 353 K / 15 h                 | 10        | 91.2      | 17               |
| PPAF-SO <sub>3</sub> H-NH <sub>2</sub>                                                         | Toluene / 90 °C / 1 h               | 8         | 100       | 18               |
| SAB                                                                                            | Ethyl acetate / 50°C / 12 h         | 4         | 99        | 19               |
| Ti <sup>4+</sup> -mont/HT                                                                      | Toluene / 80 °C / 1 h               | 0         | 93        | 20               |
| <b>TAPB-DMTP-PA-COF</b>                                                                        | <b>Solvent-free, 75°C, 5h</b>       | <b>15</b> | <b>99</b> | <b>this work</b> |

## VIII. Control experiments for clarifying the cascade deacetalization–Knoevenagel condensation reaction process

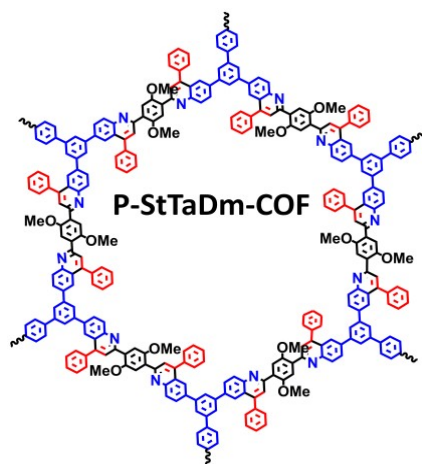

**Fig. S33** Structure of P-StTaDm-COF.<sup>21</sup>

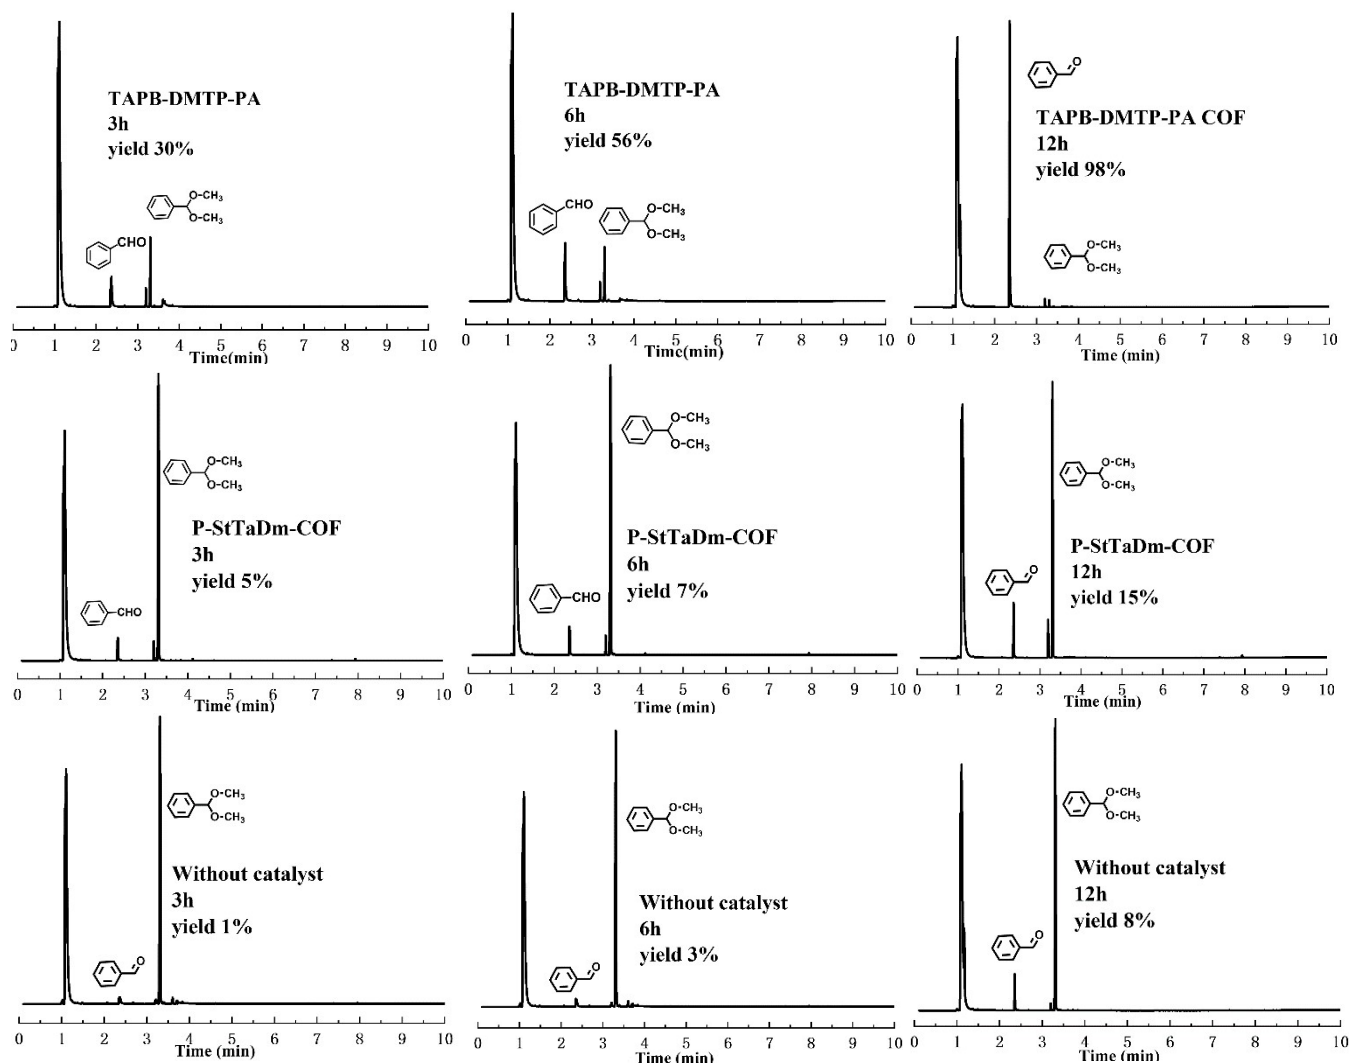

**Fig. S34** GC results of the deacetalization catalysed by TAPB-DMTP-PA-COF, P-StTaDm-COF and without catalyst.

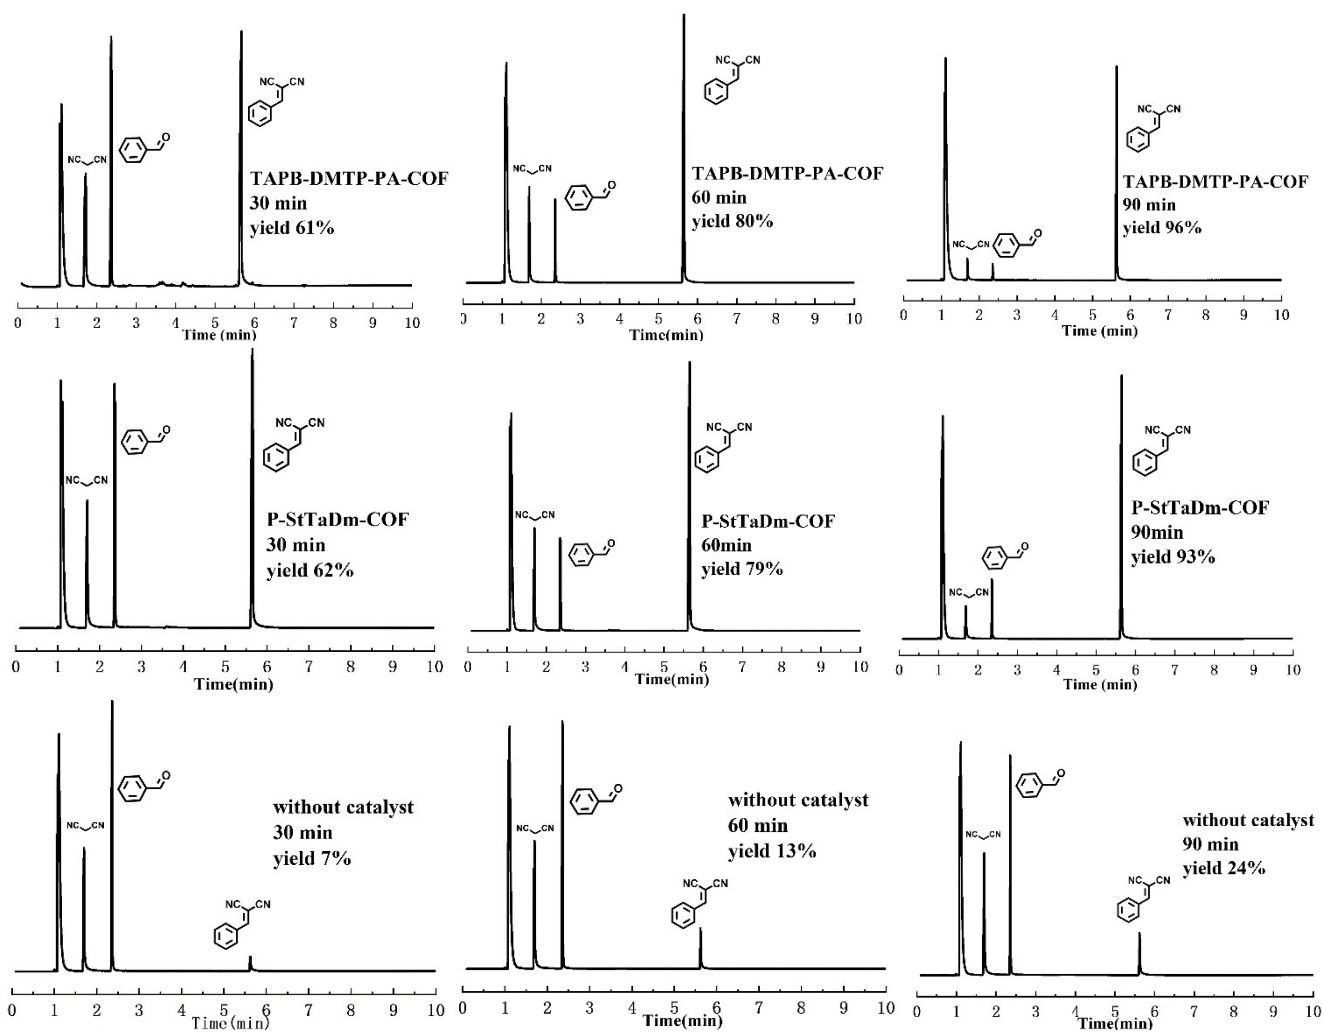

**Fig. S35** GC results of the Knoevenagel condensation by **TAPB-DMTP-PA-COF**, **P-StTaDm-COF** and without catalyst.

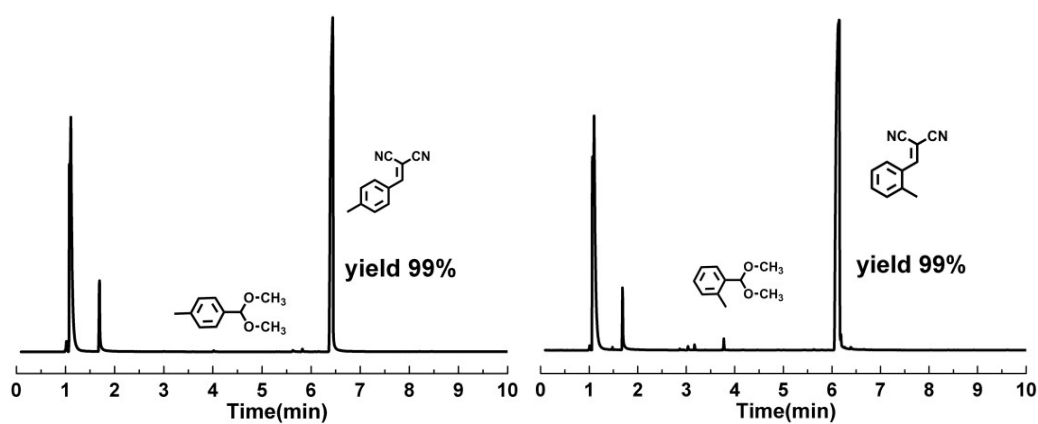

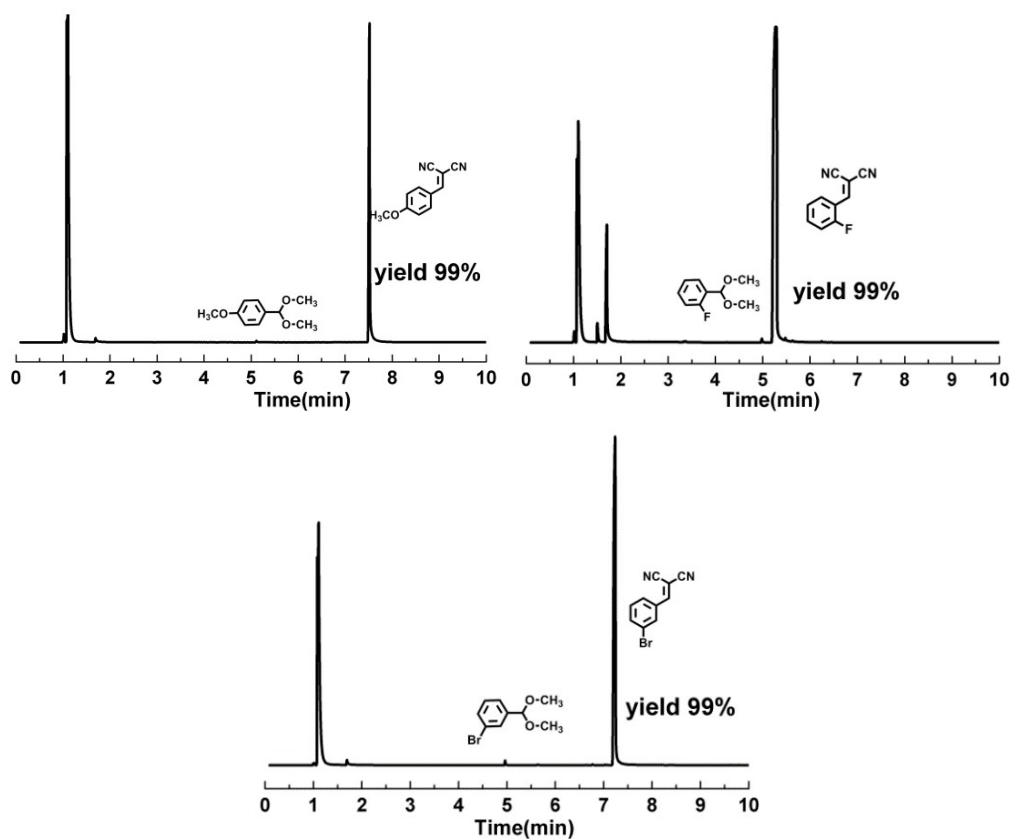

**Fig. S36** GC analysis for the scope of TAPB-DMTP-PA-COF-catalysed one-pot tandem deacetalization-Knoevenagel condensation reactions.

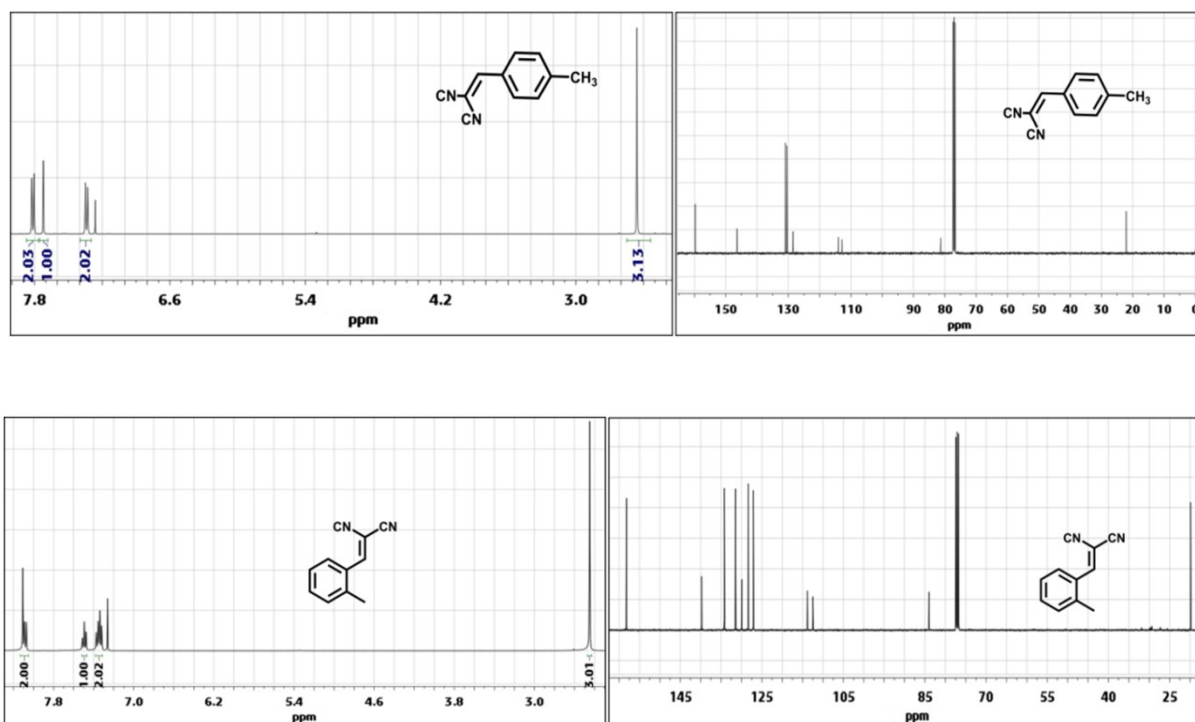



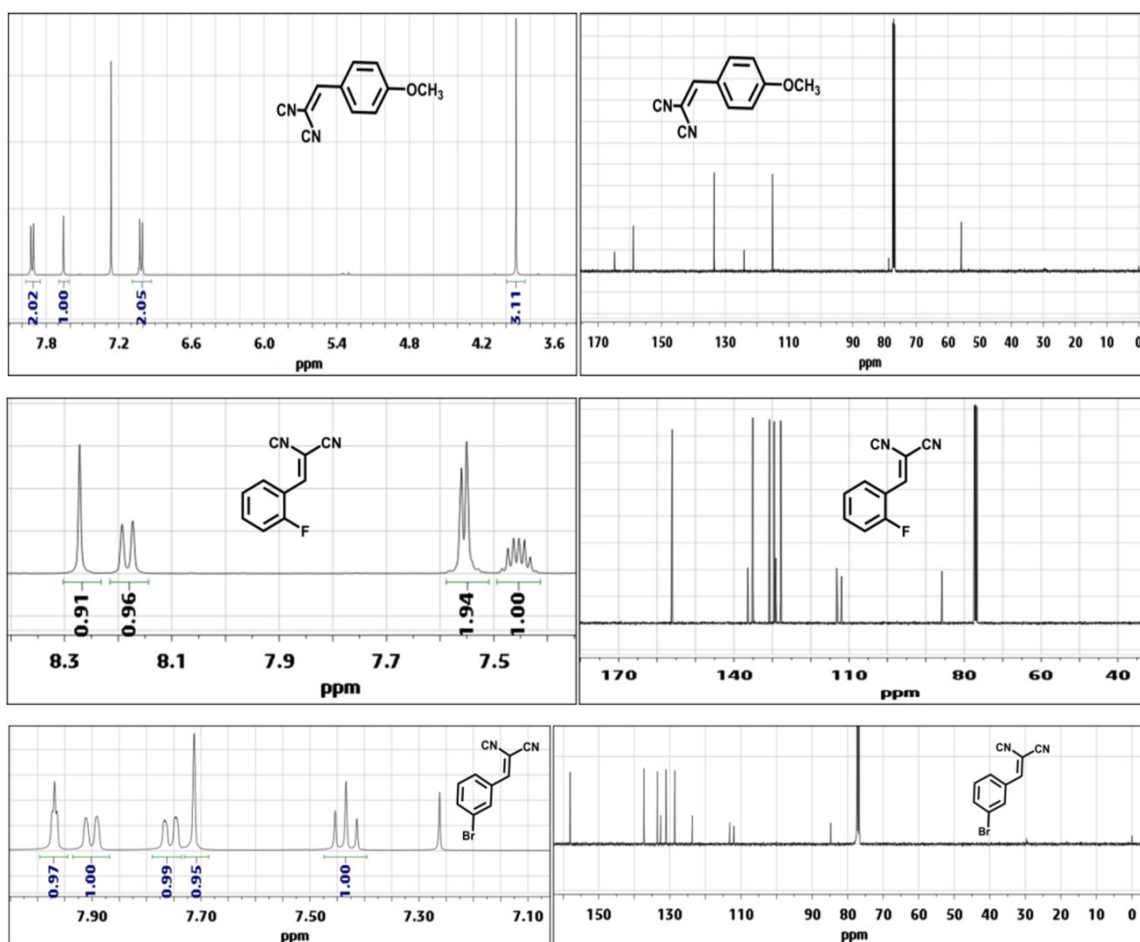

**Fig. S37**  $^1\text{H}$  NMR and  $^{13}\text{C}$  NMR spectra (400 MHz,  $\text{CDCl}_3$ ) of substituted benzylidenemalononitriles (for Fig. 4).

### IX. Continuous flow-through operation

A mixture of benzaldehyde dimethylacetal (1.5 mL, 10.0 mmol),  $\text{H}_2\text{O}$  (5 mL), malononitrile (0.80 g, 12.0 mmol) in  $\text{C}_2\text{H}_5\text{OH}$  solution (40 mL) was pumped through the spiral transparent glass tube which is evenly charged with a mixture of **TAPB-DMTP-PA-COF** (0.4 g) and glass microsphere (8.5 g) at  $75\text{ }^\circ\text{C}$  with a flow rate of  $5\text{ mL min}^{-1}$ .

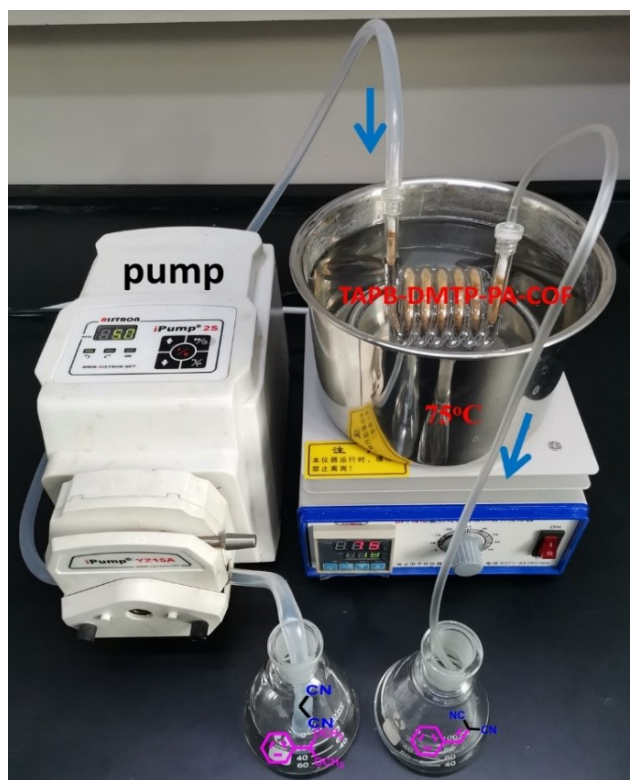

**Fig. S38** Photograph of the continuous-flow reactor for the synthesis of benzylidenemalononitrile at gram-level.

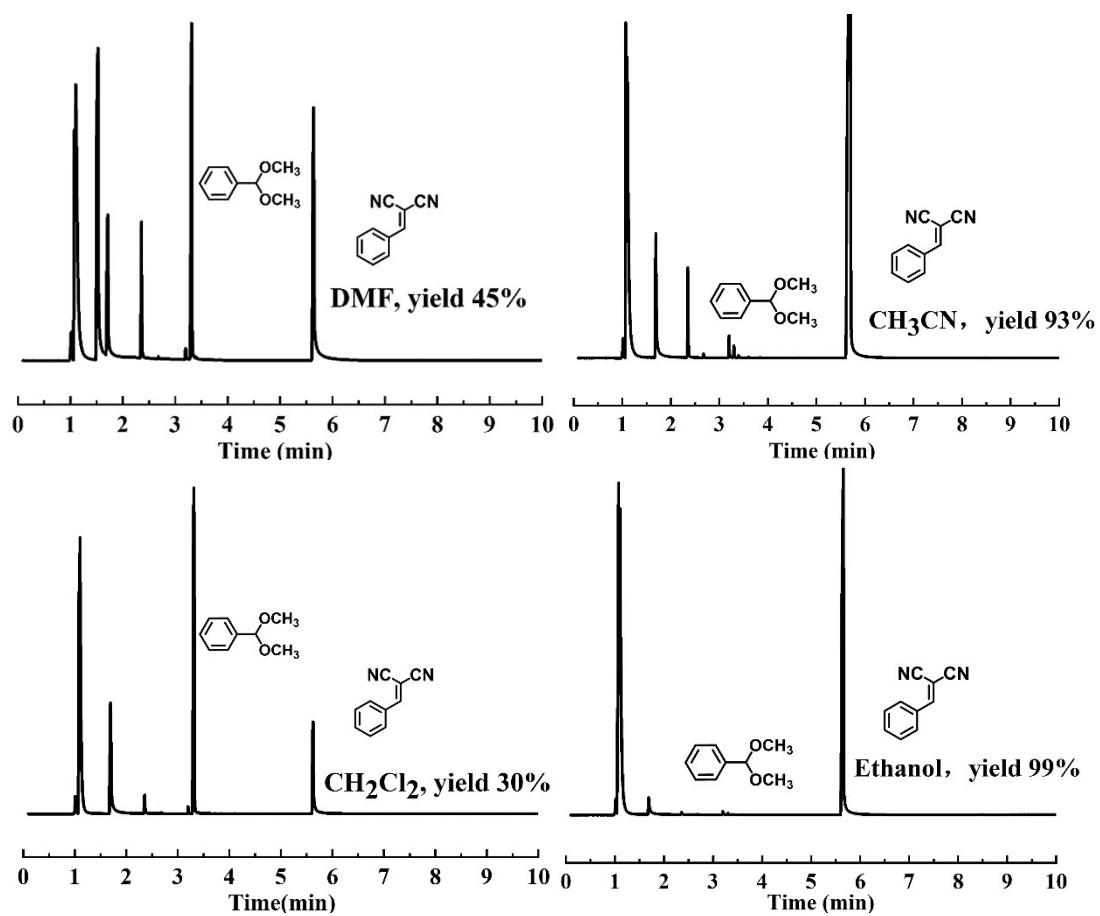

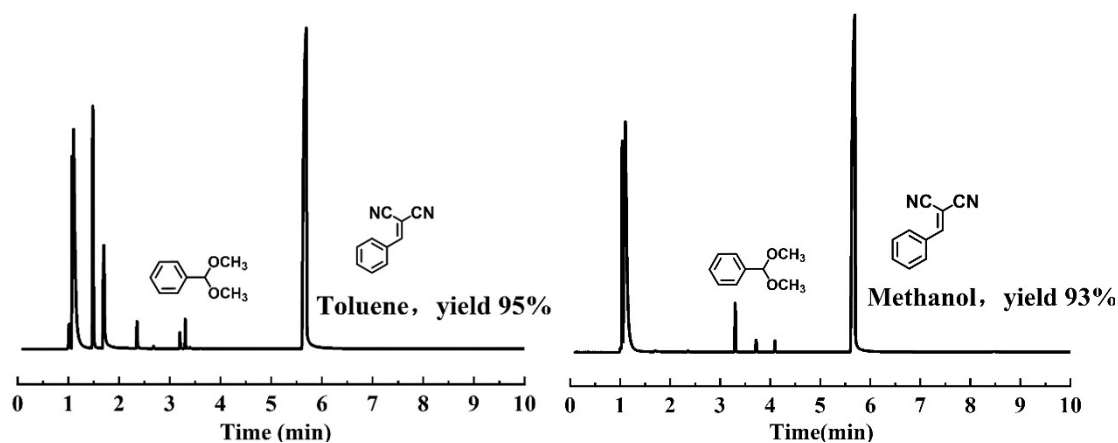

**Fig. S39** Optimization of the model reaction performed on COF-based tubular reactor in various solvents at 75 °C.

## X. Reference

1. J. W. Cleveland, D. R. Kumar, J. Cho, S. S. Jang, C. W. Jones, *Catal. Sci. Technol.*, 2021, **11**, 1311-1322.
2. S. Rat, A. Chavez-Sanchez, M. Jerigová, D. Cruz, M. Antonietti, *ACS Appl. Polym. Mater.*, 2021, **3**, 2588-2597.
3. Z. S. Zhao, Y. Zhang, T. Fang, Z. B. Han, F. S. Liang, *ACS Appl. Nano Mater.*, 2020, **3**, 6316-6320.
4. J. Wu, G. G. Chang, Y. Q. Peng, X. C. Ma, S. C. Ke, S. M. Wu, Y. X. Xiao, G. Tian, T. Xia, X. Y. Yang, *Chem. Commun.*, 2020, **56**, 6297-6300.
5. A. Karmakar, M. M. A. Soliman, G. M. D. M. Rúbio, M. F.C. G. Silva, A. J. L. Pombeiro, *Dalton Trans.*, 2020, **49**, 8075-8085.
6. L. Feng, Y. Wang, K. Zhang, K. Y. Wang, W. Fan, X. Wang, J. A. Powell, B. Guo, F. Dai, L. Zhang, R. Wang, D. Sun, H. C. Zhou, *Angew. Chem. Int. Ed.*, 2019, **58**, 16682-16690.
7. S. B. Peh, Y. Cheng, J. Zhang, Y. Wang, G. H. Chan, J. Wang, D. Zhao, *Dalton Trans.*, 2019, **48**, 7069-7073.
8. M. L. Gao, M. H. Qi, L. Liu, Z. B. Han, *Chem. Commun.*, 2019, **55**, 6377-6380.
9. Y. Zhang, Y. Wang, L. Liu, N. Wei, M. L. Gao, D. Zhao, Z. B. Han, *Inorg. Chem.* 2018, **57**, 2193-2198.
10. H. He, D. Y. Zhang, F. Guo, F. Sun, *Inorg. Chem.*, 2018, **57**, 7314-7320.
11. J. Zhao, B. Lin, Y. Zhu, Y. Zhou, H. Liu, *Catal. Sci. Technol.* 2018, **8**, 5900-5905.
12. H. Li, Q. Pan, Y. Ma, X. Guan, M. Xue, Q. Fang, Y. Yan, V. Valtchev, S. Qiu, *J. Am. Chem. Soc.*, 2016, **138**, 14783-14788.
13. B. Li, D. Ma, Y. Li, Y. Zhang, G. Li, Z. Shi, S. Feng, M. J. Zaworotko, S. Ma, *Chem. Mater.*, 2016, **28**, 4781-4786.
14. H. Yang, L. Fu, L. Wei, J. Liang, B. P. Binks, *J. Am. Chem. Soc.*, 2015, **137**, 1362-1371.
15. D. B. Shinde, S. Kandambeth, P. Pachfule, R. R. Kumar, R. Banerjee, *Chem. Commun.*, 2015, **51**, 310-313.
16. E. Merino, E. Verde-Sesto, E. M. Maya, A. Corma, M. Iglesias, F. Sánchez, *Appl. Catal. A: Gen.*, 2014, **469**, 206-212.

17. L. Xu, C. Li, K. Zhang, P. Wu, *ACS Catal.*, 2014, **4**, 2959-2968.
18. E. Merino, E. Verde-Sesto, E. M. Maya, M. Iglesias, F. Sánchez, A. Corma, *Chem. Mater.*, 2013, **25**, 981-988.
19. N. R. Shiju, A. H. Alberts, S. Khalid, D. R. Brown, G. Rothenberg, *Angew. Chem. Int. Ed.*, 2011, **50**, 9615-9619.
20. K. Motokura, N. Fujita, K. Mori, T. Mizugaki, K. Ebitani, K. Kaneda, *J. Am. Chem. Soc.*, 2005, **127**, 9674-9675.
21. X.-T. Li, J. Zou, T.-H. Wang, H.-C. Ma, G.-J. Chen and Y.-B. Dong, *J. Am. Chem. Soc.*, 2020, **142**, 6521-6526
